# Supplementary material
Source: publisher figshare collection journal article supplement (https://tandf.figshare.com/articles/dataset/_/7624892)
Supplement: Supplementary file 1 [file 2]

**Supplemental Appendix B.** List of fossil species included in the present study. Extinct species are indicated by “+”.

---

Family Merulinidae Verrill, 1865

- Genus *Trachyphyllia* Milne Edwards & Haime, 1848
  - +*Trachyphyllia bilobata* (Duncan, 1864)
  - +*Trachyphyllia chipolana* (Weisbord, 1971)
  - +*Trachyphyllia mcneilli* Budd & Klaus, sp. nov.

Family Faviidae Milne Edwards & Haime, 1857

Subfamily Mussinae Ortmann, 1890

- Genus *Mussa* Oken, 1815
  - Mussa angulosa* (Pallas, 1766)
- Genus *Antillia* Duncan, 1864
  - +*Antillia dentata* Duncan, 1864
  - +*Antillia coatesi* Budd & Klaus, sp. nov.
- Genus *Antillophyllia* Vaughan, 1932
  - +*Antillophyllia lonsdaleia* (Duncan, 1864)
  - +*Antillophyllia dominicensis* Vaughan, 1925
  - +*Antillophyllia dubia* (Duncan, 1863)
- Genus *Isophyllia* Milne Edwards & Haime, 1851
  - Isophyllia sinuosa* (Ellis & Solander, 1786)
  - +*Isophyllia jacksoni* Budd & Klaus, sp. nov.
  - +*Isophyllia maoensis* Budd & Klaus, sp. nov.
  - Isophyllia rigida* (Dana, 1846)
- Genus *Mycetophyllia* Milne Edwards & Haime, 1848
  - Mycetophyllia lamarckiana* Milne Edwards & Haime, 1849
  - Mycetophyllia aliciae* Wells, 1973
  - +*Mycetophyllia bullbrooki* Vaughan in Vaughan & Hoffmeister, 1926
  - Mycetophyllia danaana* Milne Edwards & Haime, 1849
  - Mycetophyllia ferox* Wells, 1973
  - Mycetophyllia reesi* Wells, 1973
- Genus *Scolymia* Haime, 1852
  - Scolymia lacera* (Pallas, 1766)
  - Scolymia cubensis* (Milne Edwards & Haime, 1849)
  - +*Scolymia meederi* Klaus & Budd, sp. nov.
  - +*Scolymia tamiamiensis* Klaus & Budd, sp. nov.
