# Supplementary material
Source: publisher figshare collection journal article supplement (https://tandf.figshare.com/articles/dataset/_/7624892)
Supplement: Supplementary file 2 [file 2]

**Supplemental Appendix F.** List of characters analysed in the phylogenetic analysis. "macro"= macromorphology, "micro-s"= microstructure, "micro-m"= micromorphology.

| Characters                                 | Type    | Model     | State 0                 | State 1                | State 2                 | State 3              | CI    | RI    |
|--------------------------------------------|---------|-----------|-------------------------|------------------------|-------------------------|----------------------|-------|-------|
| Solitary                                   | macro   | Unordered | Absent                  | Present                |                         |                      | 0.333 | 0.875 |
| Freeliving                                 | macro   | Unordered | Absent                  | Present, U-shaped base | Present, V-shaped base  |                      | 0.5   | 0.846 |
| Intracalicular budding                     | macro   | Unordered | Absent                  | Present                |                         |                      | 0.5   | 0.929 |
| Polymorphism-central corallite             | macro   | Unordered | Absent                  | Present                |                         |                      | 0.5   | 0.875 |
| Coenosteum                                 | macro   | Unordered | Absent                  | Present                |                         |                      | 0.2   | 0.714 |
| Corallite series                           | macro   | Ordered   | Nonserial (1-3 centres) | Uniserial (>3 centres) | Multiserial             |                      | 0.286 | 0.75  |
| Calice shape                               | macro   | Unordered | Circular                | Elliptical             | Bilobate                | Irregular            | 0.6   | 0.857 |
| Costosepta continuity                      | macro   | Unordered | Nonconfluent            | Confluent              |                         |                      | 0.5   | 0.857 |
| Number of septa                            | macro   | Ordered   | <3 cycles (<24)         | 3 cycles (24-48)       | 4-5 cycles (48-96)      | 6 cycles (>96)       | 0.214 | 0.71  |
| Number of septa per 5 mm                   | macro   | Unordered | <5                      | 5 or more              |                         |                      | 0.25  | 0.769 |
| Septa shape                                | macro   | Unordered | Straight                | Curved                 |                         |                      | 0.333 | 0.75  |
| 1 vs 3 cycle comparison (septum thickness) | macro   | Ordered   | Equal                   | Subequal               | Unequal                 |                      | 0.222 | 0.741 |
| Columella linkage                          | macro   | Unordered | Absent                  | Indirect (trabecular)  | Direct (single lamella) | Direct (>1 lamellae) | 0.5   | 0.885 |
| Columella centre threads                   | macro   | Unordered | Spongy (> 5)            | Compact (< 5)          |                         |                      | 0.25  | 0.812 |
| Septal lobes                               | macro   | Ordered   | Absent                  | Limited                | Well-developed          |                      | 0.333 | 0.826 |
| Paliform lobes                             | macro   | Unordered | Absent                  | Present                |                         |                      | 0.2   | 0.765 |
| Epitheca                                   | macro   | Ordered   | Undeveloped             | Under-developed        | Fully developed         |                      | 0.25  | 0.7   |
| Internal dissepiments                      | macro   | Ordered   | Sparse                  | Moderate               | Abundant                |                      | 0.286 | 0.706 |
| Septotheca                                 | micro-s | Unordered | Absent                  | Partial                | Prominant               |                      | 0.333 | 0.778 |
| Trabeculotheca                             | micro-s | Unordered | Absent                  | Partial                | Prominant               |                      | 0.25  | 0.769 |
| Paratheca                                  | micro-s | Unordered | Absent                  | Prominant              |                         |                      | 0.167 | 0.706 |
| Thickening deposits                        | micro-s | Unordered | Weak                    | Moderate               | Extensive               |                      | 0.222 | 0.562 |
| Transverse crosses                         | micro-s | Unordered | Absent                  | Present                |                         |                      | 0.5   | 0.833 |
| Centres of Rapid Accretion (CRA)           | micro-s | Unordered | Absent/Weak             | Moderate/Strong        |                         |                      | 0.333 | 0.895 |
| CRA Distance                               | micro-s | Ordered   | < 0.4                   | 0.7-1.8                | > 2                     |                      | 0.5   | 0.926 |
| Costa medial line                          | micro-s | Ordered   | Absent or weak          | Moderate               | Strong                  |                      | 0.182 | 0.55  |
| Septal medial line                         | micro-s | Ordered   | Absent                  | Weak                   | Moderate-Strong         |                      | 0.154 | 0.56  |
| Columella centres                          | micro-s | Unordered | Clustered               | Aligned                |                         |                      | 0.333 | 0.714 |
| Tooth base shape                           | micro-m | Unordered | Elliptical              | Circular               |                         |                      | 0.5   | 0.923 |
| Tooth base orientation                     | micro-m | Unordered | Parallel                | Perpendicular          |                         |                      | 1     | 1     |
| Tooth tip shape                            | micro-m | Unordered | Pointed                 | Multiaxial lobes       | Multiaxial threads      |                      | 1     | 1     |
| Tooth regularity                           | micro-m | Unordered | Regular                 | Irregular              |                         |                      | 1     | 1     |
| Tooth height                               | micro-m | Unordered | Small (< 0.3 mm)        | Medium (0.3-0.6 mm)    | Large (> 0.6 mm)        |                      | 0.333 | 0.81  |
| Number of teeth per 5 mm                   | micro-m | Ordered   | >= 15 (narrow spacing)  | 6-15                   | < 6 (wide spacing)      | Very wide spacing    | 0.6   | 0.931 |
| Granule abundance                          | micro-m | Unordered | Low                     | High                   |                         |                      | 1     | 1     |
| Granule alignment                          | micro-m | Ordered   | Unaligned               | Weakly Aligned         | Strongly Aligned        |                      | 0.5   | 0.882 |
| Granule shape                              | micro-m | Unordered | Rounded                 | Irregular              | Spiked                  |                      | 0.5   | 0.875 |
| Interarea structure (between teeth)        | micro-m | Unordered | Horizontal Striations   | Smooth                 | Vertical Striations     |                      | 0.667 | 0.944 |
| 1 vs 3 cycle comparison (teeth)            | micro-m | Ordered   | Equal                   | Subequal               | Unequal                 |                      | 0.333 | 0.862 |
| Wall/septum tooth size                     | micro-m | Unordered | Equal                   | Unequal                |                         |                      | 1     | 1     |
