# Supplementary material
Source: publisher figshare collection journal article supplement (https://tandf.figshare.com/articles/dataset/_/7624892)
Supplement: Supplementary file 3 [file 2]

**Supplemental Appendix C.** Extinct previously-described species of Mussinae and morphologically similar species from the Caribbean Neogene.

---

- Antillia bilobata* Duncan, 1864, p. 31, pl. 3, fig. 3 [= *Trachyphyllia bilobata*].
- Antillia bullbrooki* Hoffmeister in Vaughan & Hoffmeister, 1926, p. 119, pl. 2, figs. 7, 7a, 8, 8a [= *Antillophyllia dubia*].
- Antillia dentata* Duncan, 1864, p. 29, pl. 3, fig. 2a-c.
- Antillia dominicensis* Vaughan in Vaughan & Hoffmeister, 1925, p. 324-325, pl. 3, fig. 9, pl. 4, figs. 1, 2.
- Antillia gregorii* Vaughan, 1901, p.6, new name for *Montlivaltia ponderosa* Milne Edwards and Haime of Duncan, 1863 [= *Antillia dentata*].
- Antillia lonsdaleia* Duncan, 1864, p. 30-31, pl. 3, fig. 4 [= *Antillophyllia lonsdaleia*].
- Antillia ponderosa* Milne Edwards & Haime of Duncan, 1864, p. 28, pl. 5, fig. 5.  
[= *Trachyphyllia bilobata*].
- Antillia sawkinsi* Vaughan in Vaughan & Hoffmeister, 1926, p. 118, pl. 2, fig. 6, 6a  
[= *Antillophyllia lonsdaleia*].
- Antillia walli* Duncan in Duncan & Wall, 1865, p. 11, pl. 2, fig. 4a-c [= *Trachyphyllia bilobata*].
- Antillophyllia chipolana* Weisbord, 1971, p. 35-40, pl. 8, figs. 1-8 [= *Trachyphyllia chipolana*].
- Flabellum dubium* Duncan, 1863, p. 429 [= *Antillophyllia dubia*].
- Montlivaltia ponderosa* Milne Edwards & Haime of Duncan, 1863, p. 441-442, pl. 16, fig. 6a,b  
[= *Antillia dentata*].
- Mycetophyllia bullbrooki* Vaughan in Vaughan & Hoffmeister, 1926; p. 124-125, pl. 4, fig 3.
- Syzygophyllia tampae* Weisbord, 1973, p. 60-61, pl. 28, figs. 1-3, pl. 29, fig. 1 [?= *Antillia coatesi*, n. sp.].
