# Supplementary material
Source: publisher figshare collection journal article supplement (https://tandf.figshare.com/articles/dataset/_/7624892)
Supplement: Supplementary file 5 [file 2]

**Supplemental Appendix A.** List of all specimens studied.

| Genus    | Species  | Museum | Catalog No | CCD No | Thin Section No | Type Status                             | Locality   | Island             | Formation                | Geologic Age                   | Figure |
|----------|----------|--------|------------|--------|-----------------|-----------------------------------------|------------|--------------------|--------------------------|--------------------------------|--------|
| Antillia | ?coatesi | USNM   | 68312      | none   | none            | holotype of <i>Syzygophyllia tampae</i> | Ballast Pt | Florida            | Acadia Formation (Tampa) | Oligo-Miocene                  | 8D,E   |
| Antillia | coatesi  | SUI    | 140416     | 47845  | none            | paratype                                | NMB15836   | Dominican Republic | Gurabo Formation         | Late Miocene to Early Pliocene |        |
| Antillia | coatesi  | USNM   | 1480730    | 5091   | none            | nontype                                 | AB94-13    | Jamaica            | Bowden Formation         | Late Pliocene                  |        |
| Antillia | coatesi  | USNM   | 1480731    | 5088   | none            | nontype                                 | AB94-02    | Jamaica            | Bowden Formation         | Late Pliocene                  |        |
| Antillia | coatesi  | USNM   | 1480732    | 5090   | none            | nontype                                 | AB94-01    | Jamaica            | Bowden Formation         | Late Pliocene                  |        |
| Antillia | coatesi  | USNM   | 1480733    | 5092   | none            | nontype                                 | AB94-01    | Jamaica            | Bowden Formation         | Late Pliocene                  |        |
| Antillia | coatesi  | SUI    | 127766     | 50023  | none            | paratype                                | AB99-09    | Panama             | Old Bank Formation       | Late Miocene                   |        |
| Antillia | coatesi  | SUI    | 127767     | 50024  | 50024           | paratype                                | AB99-09    | Panama             | Old Bank Formation       | Late Miocene                   |        |
| Antillia | coatesi  | SUI    | 129406     | 50025  | 50025           | paratype                                | AB99-09    | Panama             | Old Bank Formation       | Late Miocene                   |        |
| Antillia | coatesi  | SUI    | 127769     | 50026  | 50026           | paratype                                | AB99-09    | Panama             | Old Bank Formation       | Late Miocene                   |        |
| Antillia | coatesi  | SUI    | 127770     | 50027  | none            | paratype                                | AB99-09    | Panama             | Old Bank Formation       | Late Miocene                   |        |
| Antillia | coatesi  | SUI    | 127771     | 50028  | none            | paratype                                | AB99-09    | Panama             | Old Bank Formation       | Late Miocene                   |        |
| Antillia | coatesi  | SUI    | 127772     | 50029  | none            | paratype                                | AB99-09    | Panama             | Old Bank Formation       | Late Miocene                   |        |
| Antillia | coatesi  | SUI    | 127773     | 50030  | none            | paratype                                | AB99-09    | Panama             | Old Bank Formation       | Late Miocene                   |        |
| Antillia | coatesi  | SUI    | 127774     | 50031  | 50031           | paratype                                | AB99-09    | Panama             | Old Bank Formation       | Late Miocene                   |        |
| Antillia | coatesi  | SUI    | 129448     | 50032  | 50032           | paratype                                | AB99-09    | Panama             | Old Bank Formation       | Late Miocene                   |        |
| Antillia | coatesi  | SUI    | 127776     | 50033  | none            | paratype                                | AB99-09    | Panama             | Old Bank Formation       | Late Miocene                   |        |
| Antillia | coatesi  | SUI    | 129442     | 50034  | 50034           | paratype                                | AB99-09    | Panama             | Old Bank Formation       | Late Miocene                   |        |
| Antillia | coatesi  | SUI    | 127778     | 50035  | none            | paratype                                | AB99-09    | Panama             | Old Bank Formation       | Late Miocene                   |        |
| Antillia | coatesi  | SUI    | 127779     | 50036  | none            | paratype                                | AB99-09    | Panama             | Old Bank Formation       | Late Miocene                   |        |
| Antillia | coatesi  | SUI    | 127780     | 50037  | none            | paratype                                | AB99-09    | Panama             | Old Bank Formation       | Late Miocene                   |        |
| Antillia | coatesi  | SUI    | 127781     | 50038  | none            | paratype                                | AB99-09    | Panama             | Old Bank Formation       | Late Miocene                   |        |
| Antillia | coatesi  | SUI    | 127782     | 50039  | 50039           | paratype                                | AB99-09    | Panama             | Old Bank Formation       | Late Miocene                   |        |
| Antillia | coatesi  | SUI    | 129441     | 50040  | 50040           | paratype                                | AB99-09    | Panama             | Old Bank Formation       | Late Miocene                   |        |
| Antillia | coatesi  | SUI    | 127784     | 50041  | none            | paratype                                | AB99-09    | Panama             | Old Bank Formation       | Late Miocene                   |        |
| Antillia | coatesi  | SUI    | 127785     | 50042  | none            | paratype                                | AB99-09    | Panama             | Old Bank Formation       | Late Miocene                   |        |
| Antillia | coatesi  | SUI    | 127786     | 50043  | 50043           | paratype                                | AB99-09    | Panama             | Old Bank Formation       | Late Miocene                   |        |
| Antillia | coatesi  | SUI    | 127787     | 50044  | 50044           | paratype                                | AB99-09    | Panama             | Old Bank Formation       | Late Miocene                   |        |
| Antillia | coatesi  | SUI    | 127788     | 50045  | 50045           | holotype                                | AB99-09    | Panama             | Old Bank Formation       | Late Miocene                   | 8A,B   |
| Antillia | coatesi  | SUI    | 129447     | 50047  | none            | paratype                                | AB99-09    | Panama             | Old Bank Formation       | Late Miocene                   | 8C     |
| Antillia | coatesi  | SUI    | 127791     | 50048  | 50048           | paratype                                | AB99-09    | Panama             | Old Bank Formation       | Late Miocene                   |        |
| Antillia | coatesi  | SUI    | 127792     | 50049  | none            | paratype                                | AB99-09    | Panama             | Old Bank Formation       | Late Miocene                   |        |
| Antillia | coatesi  | SUI    | 129466     | 50050  | 50050           | paratype                                | AB99-09    | Panama             | Old Bank Formation       | Late Miocene                   |        |
| Antillia | coatesi  | SUI    | 127794     | 50051  | 50051           | paratype                                | AB99-09    | Panama             | Old Bank Formation       | Late Miocene                   | 8F-I   |
| Antillia | coatesi  | SUI    | 127795     | 50052  | none            | paratype                                | AB99-09    | Panama             | Old Bank Formation       | Late Miocene                   |        |
| Antillia | coatesi  | USNM   | 1480734    | 30171  | none            | nontype                                 | AB98-14    | Panama             | Old Bank Formation       | Late Miocene                   |        |
| Antillia | coatesi  | USNM   | 1480735    | 30176  | none            | nontype                                 | AB98-14    | Panama             | Old Bank Formation       | Late Miocene                   |        |
| Antillia | coatesi  | USNM   | 1480736    | 30178  | none            | nontype                                 | AB98-14    | Panama             | Old Bank Formation       | Late Miocene                   |        |
| Antillia | dentata  | SUI    | 140409     | none   | KJ8712          | nontype                                 | KJ87-12    | Dominican Republic | Cercado Formation        | Late Miocene                   |        |
| Antillia | dentata  | SUI    | 146005     | 46753  | none            | nontype                                 | NMB15837   | Dominican Republic | Gurabo Formation         | Late Miocene to Early Pliocene |        |
| Antillia | dentata  | SUI    | 146006     | 46767  | none            | nontype                                 | NMB15837   | Dominican Republic | Gurabo Formation         | Late Miocene to Early Pliocene |        |
| Antillia | dentata  | SUI    | 146007     | 46773  | none            | nontype                                 | NMB15837   | Dominican Republic | Gurabo Formation         | Late Miocene to Early Pliocene |        |
| Antillia | dentata  | SUI    | 146008     | 47753  | none            | nontype                                 | NMB15837   | Dominican Republic | Gurabo Formation         | Late Miocene to Early Pliocene |        |
| Antillia | dentata  | SUI    | 146009     | 47846  | none            | nontype                                 | NMB15836   | Dominican Republic | Gurabo Formation         | Late Miocene to Early Pliocene |        |
| Antillia | dentata  | SUI    | 146010     | 47848  | none            | nontype                                 | NMB15836   | Dominican Republic | Gurabo Formation         | Late Miocene to Early Pliocene |        |
| Antillia | dentata  | SUI    | 146011     | 47858  | none            | nontype                                 | JK08-44    | Dominican Republic | Gurabo Formation         | Late Miocene to Early Pliocene |        |
| Antillia | dentata  | SUI    | 146012     | 47859  | none            | nontype                                 | JK08-44    | Dominican Republic | Gurabo Formation         | Late Miocene to Early Pliocene |        |
| Antillia | dentata  | SUI    | 146013     | 47860  | none            | nontype                                 | JK08-44    | Dominican Republic | Gurabo Formation         | Late Miocene to Early Pliocene |        |
| Antillia | dentata  | SUI    | 146014     | 47862  | none            | nontype                                 | JK08-44    | Dominican Republic | Gurabo Formation         | Late Miocene to Early Pliocene |        |
| Antillia | dentata  | SUI    | 146015     | 47863  | none            | nontype                                 | JK08-44    | Dominican Republic | Gurabo Formation         | Late Miocene to Early Pliocene |        |
| Antillia | dentata  | SUI    | 146016     | 47864  | none            | nontype                                 | JK08-44    | Dominican Republic | Gurabo Formation         | Late Miocene to Early Pliocene |        |
| Antillia | dentata  | SUI    | 146017     | 47897  | none            | nontype                                 | JK08-42    | Dominican Republic | Gurabo Formation         | Late Miocene to Early Pliocene |        |
| Antillia | dentata  | SUI    | 146018     | 47898  | none            | nontype                                 | JK08-42    | Dominican Republic | Gurabo Formation         | Late Miocene to Early Pliocene |        |
| Antillia | dentata  | SUI    | 146019     | 47899  | none            | nontype                                 | JK08-42    | Dominican Republic | Gurabo Formation         | Late Miocene to Early Pliocene |        |
| Antillia | dentata  | SUI    | 146020     | 47900  | none            | nontype                                 | JK08-42    | Dominican Republic | Gurabo Formation         | Late Miocene to Early Pliocene |        |
| Antillia | dentata  | SUI    | 146021     | 47901  | none            | nontype                                 | JK08-42    | Dominican Republic | Gurabo Formation         | Late Miocene to Early Pliocene |        |
| Antillia | dentata  | SUI    | 146022     | 47903  | none            | nontype                                 | JK08-42    | Dominican Republic | Gurabo Formation         | Late Miocene to Early Pliocene |        |

**Supplemental Appendix A.** List of all specimens studied.

|          |         |      |         |       |        |         |           |                    |                  |                                |  |
|----------|---------|------|---------|-------|--------|---------|-----------|--------------------|------------------|--------------------------------|--|
| Antillia | dentata | SUI  | 146023  | 47904 | none   | nontype | JK08-42   | Dominican Republic | Gurabo Formation | Late Miocene to Early Pliocene |  |
| Antillia | dentata | SUI  | 146024  | 47905 | none   | nontype | JK08-42   | Dominican Republic | Gurabo Formation | Late Miocene to Early Pliocene |  |
| Antillia | dentata | SUI  | 146025  | 47906 | none   | nontype | JK08-42   | Dominican Republic | Gurabo Formation | Late Miocene to Early Pliocene |  |
| Antillia | dentata | SUI  | 146026  | 47908 | none   | nontype | JK08-42   | Dominican Republic | Gurabo Formation | Late Miocene to Early Pliocene |  |
| Antillia | dentata | SUI  | 146027  | 47910 | none   | nontype | JK08-42   | Dominican Republic | Gurabo Formation | Late Miocene to Early Pliocene |  |
| Antillia | dentata | SUI  | 146028  | 47911 | none   | nontype | JK08-42   | Dominican Republic | Gurabo Formation | Late Miocene to Early Pliocene |  |
| Antillia | dentata | SUI  | 146029  | 47956 | none   | nontype | JK08-40   | Dominican Republic | Gurabo Formation | Late Miocene to Early Pliocene |  |
| Antillia | dentata | SUI  | 146030  | 48040 | none   | nontype | DM08-22   | Dominican Republic | Gurabo Formation | Late Miocene to Early Pliocene |  |
| Antillia | dentata | SUI  | 146031  | 48041 | none   | nontype | DM08-22   | Dominican Republic | Gurabo Formation | Late Miocene to Early Pliocene |  |
| Antillia | dentata | SUI  | 146032  | 48042 | none   | nontype | DM08-22   | Dominican Republic | Gurabo Formation | Late Miocene to Early Pliocene |  |
| Antillia | dentata | SUI  | 146033  | 48043 | none   | nontype | DM08-22   | Dominican Republic | Gurabo Formation | Late Miocene to Early Pliocene |  |
| Antillia | dentata | SUI  | 146034  | 54892 | none   | nontype | BB-15-81  | Dominican Republic | Gurabo Formation | Late Miocene to Early Pliocene |  |
| Antillia | dentata | SUI  | 146035  | 54901 | none   | nontype | BB-15-81  | Dominican Republic | Gurabo Formation | Late Miocene to Early Pliocene |  |
| Antillia | dentata | SUI  | 146036  | 54928 | none   | nontype | BB-15-121 | Dominican Republic | Gurabo Formation | Late Miocene to Early Pliocene |  |
| Antillia | dentata | SUI  | 146037  | 54945 | none   | nontype | BB-15-121 | Dominican Republic | Gurabo Formation | Late Miocene to Early Pliocene |  |
| Antillia | dentata | USNM | 1454345 | 42700 | none   | nontype | NMB16819  | Dominican Republic | Gurabo Formation | Late Miocene to Early Pliocene |  |
| Antillia | dentata | SUI  | 106618  | 43263 | 106618 | nontype | JK06-42   | Dominican Republic | Gurabo Formation | Late Miocene to Early Pliocene |  |
| Antillia | dentata | SUI  | 106619  | 43264 | 43264  | nontype | JK06-42   | Dominican Republic | Gurabo Formation | Late Miocene to Early Pliocene |  |
| Antillia | dentata | USNM | 1454466 | 43265 | none   | nontype | NMB16865  | Dominican Republic | Gurabo Formation | Late Miocene to Early Pliocene |  |
| Antillia | dentata | USNM | 1454348 | 43266 | none   | nontype | NMB16865  | Dominican Republic | Gurabo Formation | Late Miocene to Early Pliocene |  |
| Antillia | dentata | USNM | 1454465 | 43267 | none   | nontype | NMB16865  | Dominican Republic | Gurabo Formation | Late Miocene to Early Pliocene |  |
| Antillia | dentata | USNM | 1454347 | 43313 | none   | nontype | NMB16867  | Dominican Republic | Gurabo Formation | Late Miocene to Early Pliocene |  |
| Antillia | dentata | USNM | 1454314 | 43314 | none   | nontype | NMB16867  | Dominican Republic | Gurabo Formation | Late Miocene to Early Pliocene |  |
| Antillia | dentata | USNM | 1454467 | 43315 | none   | nontype | NMB16867  | Dominican Republic | Gurabo Formation | Late Miocene to Early Pliocene |  |
| Antillia | dentata | USNM | 1454464 | 43316 | none   | nontype | NMB16867  | Dominican Republic | Gurabo Formation | Late Miocene to Early Pliocene |  |
| Antillia | dentata | USNM | 1454468 | 43317 | none   | nontype | NMB16867  | Dominican Republic | Gurabo Formation | Late Miocene to Early Pliocene |  |
| Antillia | dentata | USNM | 1454351 | 43318 | none   | nontype | NMB16867  | Dominican Republic | Gurabo Formation | Late Miocene to Early Pliocene |  |
| Antillia | dentata | USNM | 1454353 | 43319 | none   | nontype | NMB16867  | Dominican Republic | Gurabo Formation | Late Miocene to Early Pliocene |  |
| Antillia | dentata | USNM | 1454344 | 43320 | none   | nontype | NMB16867  | Dominican Republic | Gurabo Formation | Late Miocene to Early Pliocene |  |
| Antillia | dentata | USNM | 1454463 | 43321 | none   | nontype | NMB16867  | Dominican Republic | Gurabo Formation | Late Miocene to Early Pliocene |  |
| Antillia | dentata | USNM | 1454354 | 43322 | none   | nontype | NMB16867  | Dominican Republic | Gurabo Formation | Late Miocene to Early Pliocene |  |
| Antillia | dentata | USNM | 1454346 | 43455 | none   | nontype | NMB16824  | Dominican Republic | Gurabo Formation | Late Miocene to Early Pliocene |  |
| Antillia | dentata | SUI  | 129449  | 47432 | 47432  | nontype | JK08-40   | Dominican Republic | Gurabo Formation | Late Miocene to Early Pliocene |  |
| Antillia | dentata | SUI  | 137217  | 47847 | none   | nontype | JK08-16   | Dominican Republic | Gurabo Formation | Late Miocene to Early Pliocene |  |
| Antillia | dentata | SUI  | 129436  | 47856 | 47856  | nontype | JK08-44   | Dominican Republic | Gurabo Formation | Late Miocene to Early Pliocene |  |
| Antillia | dentata | SUI  | 140410  | 47857 | 47857  | nontype | JK08-44   | Dominican Republic | Gurabo Formation | Late Miocene to Early Pliocene |  |
| Antillia | dentata | SUI  | 129445  | 47861 | 47861  | nontype | JK08-44   | Dominican Republic | Gurabo Formation | Late Miocene to Early Pliocene |  |
| Antillia | dentata | SUI  | 137106  | 47902 | none   | nontype | JK08-42   | Dominican Republic | Gurabo Formation | Late Miocene to Early Pliocene |  |
| Antillia | dentata | SUI  | 140411  | 47907 | none   | nontype | JK08-42   | Dominican Republic | Gurabo Formation | Late Miocene to Early Pliocene |  |
| Antillia | dentata | SUI  | 137216  | 47909 | none   | nontype | JK08-42   | Dominican Republic | Gurabo Formation | Late Miocene to Early Pliocene |  |

**Supplemental Appendix A.** List of all specimens studied.

|                |              |       |           |       |             |                                           |              |                    |                        |                                |       |
|----------------|--------------|-------|-----------|-------|-------------|-------------------------------------------|--------------|--------------------|------------------------|--------------------------------|-------|
| Antillia       | dentata      | SUI   | 146038    | 54890 | none        | nontype                                   | BB-15-126    | Dominican Republic | Gurabo Formation       | Late Miocene to Early Pliocene |       |
| Antillia       | dentata      | SUI   | 146039    | 54891 | none        | nontype                                   | BB-15-126    | Dominican Republic | Gurabo Formation       | Late Miocene to Early Pliocene |       |
| Antillia       | dentata      | SUI   | 146040    | 54893 | none        | nontype                                   | BB-15-126    | Dominican Republic | Gurabo Formation       | Late Miocene to Early Pliocene |       |
| Antillia       | dentata      | SUI   | 146041    | 55265 | none        | nontype                                   | JK16-06      | Dominican Republic | Gurabo Formation       | Late Miocene to Early Pliocene |       |
| Antillia       | dentata      | NMB   | D6612     | 10198 | none        | figured                                   | NMB16808     | Dominican Republic | Gurabo Formation       | Late Miocene to Early Pliocene | 7G,J  |
| Antillia       | dentata      | SUI   | 140412    | none  | casebolt030 | figured                                   | KJ87-11      | Dominican Republic | Gurabo Formation       | Late Miocene to Early Pliocene | 7H,I  |
| Antillia       | dentata      | SUI   | 146042    | 55139 | none        | nontype                                   | JK16-08      | Dominican Republic | Gurabo/Mao Formation   | Early Pliocene                 |       |
| Antillia       | dentata      | SUI   | 146043    | 55151 | none        | nontype                                   | JK16-08      | Dominican Republic | Gurabo/Mao Formation   | Early Pliocene                 |       |
| Antillia       | dentata      | SUI   | 146044    | 55152 | none        | nontype                                   | JK16-08      | Dominican Republic | Gurabo/Mao Formation   | Early Pliocene                 |       |
| Antillia       | dentata      | SUI   | 146045    | 51511 | none        | nontype                                   | BC13-36C     | Dominican Republic | Los Haitises Formation | Early Pleistocene              |       |
| Antillia       | dentata      | SUI   | 146046    | 47494 | none        | nontype                                   | JK08-24      | Dominican Republic | Mao Formation          | Early Pliocene                 |       |
| Antillia       | dentata      | SUI   | 146047    | 47508 | none        | nontype                                   | JK08-24      | Dominican Republic | Mao Formation          | Early Pliocene                 |       |
| Antillia       | dentata      | SUI   | 146048    | 47519 | none        | nontype                                   | JK08-24      | Dominican Republic | Mao Formation          | Early Pliocene                 |       |
| Antillia       | dentata      | SUI   | 140418    | 47125 | none        | nontype                                   | JK08-21      | Dominican Republic | Mao Formation          | Early Pliocene                 |       |
| Antillia       | dentata      | NHMUK | PI R28761 | none  | none        | holotype                                  | Nivajé Shale | Dominican Republic | unknown                | Neogene                        | 7A,E  |
| Antillia       | dentata      | SUI   | 146049    | 49196 | none        | nontype                                   | NMB15846     | DomRep             | Gurabo Formation       | Late Miocene to Early Pliocene |       |
| Antillia       | dentata      | NHMUK | PI R28794 | none  | none        | holotype of <i>Montlivaltia ponderosa</i> | none         | Jamaica            | unknown                | Neogene                        | 7C,D  |
| Antillophyllia | dominicensis | SUI   | 146050    | 46715 | none        | nontype                                   | NMB15837     | Dominican Republic | Gurabo Formation       | Late Miocene to Early Pliocene |       |
| Antillophyllia | dominicensis | SUI   | 146051    | 46899 | none        | nontype                                   | NMB15837     | Dominican Republic | Gurabo Formation       | Late Miocene to Early Pliocene |       |
| Antillophyllia | dominicensis | SUI   | 146052    | 47854 | none        | nontype                                   | JK08-44      | Dominican Republic | Gurabo Formation       | Late Miocene to Early Pliocene |       |
| Antillophyllia | dominicensis | SUI   | 146053    | 54895 | none        | nontype                                   | BB-15-121    | Dominican Republic | Gurabo Formation       | Late Miocene to Early Pliocene |       |
| Antillophyllia | dominicensis | SUI   | 146054    | 54897 | none        | nontype                                   | BB-15-121    | Dominican Republic | Gurabo Formation       | Late Miocene to Early Pliocene |       |
| Antillophyllia | dominicensis | SUI   | 146055    | 55252 | none        | nontype                                   | JK16-06      | Dominican Republic | Gurabo Formation       | Late Miocene to Early Pliocene |       |
| Antillophyllia | dominicensis | SUI   | 140399    | none  | 16884       | figured                                   | KJ87-25      | Dominican Republic | Mao Formation          | Early Pliocene                 | 10C,F |
| Antillophyllia | dominicensis | SUI   | 146056    | 47102 | none        | nontype                                   | JK08-21      | Dominican Republic | Mao Formation          | Early Pliocene                 |       |
| Antillophyllia | dominicensis | SUI   | 146057    | 47171 | none        | nontype                                   | JK08-28      | Dominican Republic | Mao Formation          | Early Pliocene                 |       |
| Antillophyllia | dominicensis | MCZ   | 103511    | none  | none        | holotype                                  | Nivajé Shale | Dominican Republic | unknown                | Neogene                        | 10A,D |
| Antillophyllia | dominicensis | SUI   | 146058    | 53031 | none        | figured                                   | CF003        | Florida            | Tamiami Formation      | Late Pliocene                  | 10B,E |
| Antillophyllia | dominicensis | SUI   | 146059    | 53031 | none        | nontype                                   | CF003        | Florida            | Tamiami Formation      | Late Pliocene                  |       |
| Antillophyllia | dominicensis | SUI   | 146060    | 53514 | none        | nontype                                   | CF001        | Florida            | Tamiami Formation      | Late Pliocene                  |       |
| Antillophyllia | dominicensis | SUI   | 146061    | 54012 | none        | nontype                                   | CF003        | Florida            | Tamiami Formation      | Late Pliocene                  |       |
| Antillophyllia | dominicensis | SUI   | 146062    | 54568 | none        | nontype                                   | CF003        | Florida            | Tamiami Formation      | Late Pliocene                  |       |
| Antillophyllia | dubia        | SUI   | 118776    | 0091  | none        | nontype                                   | CJ92-6(3)    | Costa Rica         | Moin Formation         | Early Pleistocene              |       |
| Antillophyllia | dubia        | NHMUK | PI R28837 | none  | none        | holotype                                  | Nivajé Shale | Dominican Republic | unknown                | Neogene                        | 10G,J |
| Antillophyllia | dubia        | SUI   | 129443    | none  | 457         | figured                                   | T457         | Florida            | Chipola Formation      | Early Miocene                  | 10I,L |
| Antillophyllia | dubia        | SUI   | 146063    | 53760 | none        | nontype                                   | CF038        | Florida            | Tamiami Formation      | Late Pliocene                  |       |
| Antillophyllia | dubia        | SUI   | 146064    | 54103 | none        | nontype                                   | CF002        | Florida            | Tamiami Formation      | Late Pliocene                  |       |
| Antillophyllia | dubia        | SUI   | 146065    | 54260 | none        | nontype                                   | CF003        | Florida            | Tamiami Formation      | Late Pliocene                  |       |
| Antillophyllia | dubia        | SUI   | 146066    | none  | none        | nontype                                   | LF002        | Florida            | Tamiami Formation      | Late Pliocene                  |       |
| Antillophyllia | dubia        | USNM  | M353675   | none  | none        | holotype of <i>Antillia bullbrookii</i>   | USGS 9286    | Trinidad           | Tamana Formation       | Early to Middle Miocene        | 10H,K |
| Antillophyllia | lonsdaleia   | SUI   | 118966    | 3563  | none        | nontype                                   | AB93-23      | Costa Rica         | Moin Formation         | Early Pleistocene              |       |
| Antillophyllia | lonsdaleia   | SUI   | 118475    | 3305  | none        | nontype                                   | KJ-LM-1      | Costa Rica         | Moin Formation         | Early Pleistocene              |       |
| Antillophyllia | lonsdaleia   | SUI   | 146067    | 47746 | none        | nontype                                   | NMB15899     | Dominican Republic | Cercado Formation      | Late Miocene                   |       |
| Antillophyllia | lonsdaleia   | SUI   | 140413    | 47750 | 12517       | nontype                                   | NMB15899     | Dominican Republic | Cercado Formation      | Late Miocene                   |       |
| Antillophyllia | lonsdaleia   | USNM  | 1455986   | 42950 | none        | nontype                                   | KB05-07      | Dominican Republic | Cercado Formation      | Late Miocene                   |       |
| Antillophyllia | lonsdaleia   | USNM  | 1456615   | 44825 | none        | nontype                                   | JK06-19      | Dominican Republic | Cercado Formation      | Late Miocene                   |       |



**Supplemental Appendix A.** List of all specimens studied.

|                |            |       |           |       |       |               |              |                    |                      |                                |      |
|----------------|------------|-------|-----------|-------|-------|---------------|--------------|--------------------|----------------------|--------------------------------|------|
| Antillophyllia | lonsdaleia | USNM  | 1456621   | 42870 | none  | nontype       | NMB16819     | Dominican Republic | Gurabo Formation     | Late Miocene to Early Pliocene |      |
| Antillophyllia | lonsdaleia | USNM  | 1456612   | 43088 | none  | nontype       | NMB16862     | Dominican Republic | Gurabo Formation     | Late Miocene to Early Pliocene |      |
| Antillophyllia | lonsdaleia | USNM  | 1455987   | 43089 | none  | nontype       | NMB16862     | Dominican Republic | Gurabo Formation     | Late Miocene to Early Pliocene |      |
| Antillophyllia | lonsdaleia | USNM  | 1456614   | 43090 | none  | nontype       | NMB16862     | Dominican Republic | Gurabo Formation     | Late Miocene to Early Pliocene |      |
| Antillophyllia | lonsdaleia | USNM  | 1455984   | 43091 | none  | nontype       | NMB16862     | Dominican Republic | Gurabo Formation     | Late Miocene to Early Pliocene |      |
| Antillophyllia | lonsdaleia | USNM  | 1456604   | 43092 | none  | nontype       | NMB16862     | Dominican Republic | Gurabo Formation     | Late Miocene to Early Pliocene |      |
| Antillophyllia | lonsdaleia | USNM  | 1456617   | 43093 | none  | nontype       | NMB16862     | Dominican Republic | Gurabo Formation     | Late Miocene to Early Pliocene |      |
| Antillophyllia | lonsdaleia | USNM  | 1455988   | 43094 | none  | nontype       | NMB16862     | Dominican Republic | Gurabo Formation     | Late Miocene to Early Pliocene |      |
| Antillophyllia | lonsdaleia | USNM  | 1456610   | 43095 | none  | nontype       | NMB16862     | Dominican Republic | Gurabo Formation     | Late Miocene to Early Pliocene |      |
| Antillophyllia | lonsdaleia | USNM  | 1456613   | 43096 | none  | nontype       | NMB16862     | Dominican Republic | Gurabo Formation     | Late Miocene to Early Pliocene |      |
| Antillophyllia | lonsdaleia | NMB   | D6611     | 10120 | none  | figured       | NMB16910     | Dominican Republic | Gurabo Formation     | Late Miocene to Early Pliocene | 9C,F |
| Antillophyllia | lonsdaleia | NMB   | D5917     | 10160 | none  | nontype       | NMB16809     | Dominican Republic | Gurabo Formation     | Late Miocene to Early Pliocene |      |
| Antillophyllia | lonsdaleia | SUI   | 106640    | 43102 | none  | nontype       | NMB16828     | Dominican Republic | Gurabo Formation     | Late Miocene to Early Pliocene |      |
| Antillophyllia | lonsdaleia | SUI   | 106620    | 43216 | 43216 | nontype       | NMB16828     | Dominican Republic | Gurabo Formation     | Late Miocene to Early Pliocene |      |
| Antillophyllia | lonsdaleia | SUI   | 106630    | 43246 | none  | figured       | NMB16828     | Dominican Republic | Gurabo Formation     | Late Miocene to Early Pliocene | 9H,I |
| Antillophyllia | lonsdaleia | SUI   | 140414    | 47817 | 47817 | nontype       | JK08-51      | Dominican Republic | Gurabo Formation     | Late Miocene to Early Pliocene |      |
| Antillophyllia | lonsdaleia | SUI   | 146102    | 54903 | none  | nontype       | BB-15-126    | Dominican Republic | Gurabo Formation     | Late Miocene to Early Pliocene |      |
| Antillophyllia | lonsdaleia | SUI   | 146103    | 54919 | none  | nontype       | BB-15-126    | Dominican Republic | Gurabo Formation     | Late Miocene to Early Pliocene |      |
| Antillophyllia | lonsdaleia | SUI   | 146104    | 54926 | none  | nontype       | BB-15-126    | Dominican Republic | Gurabo Formation     | Late Miocene to Early Pliocene |      |
| Antillophyllia | lonsdaleia | SUI   | 146105    | 55113 | none  | nontype       | JK16-06      | Dominican Republic | Gurabo Formation     | Late Miocene to Early Pliocene |      |
| Antillophyllia | lonsdaleia | SUI   | 146106    | 55223 | none  | nontype       | JK16-06      | Dominican Republic | Gurabo Formation     | Late Miocene to Early Pliocene |      |
| Antillophyllia | lonsdaleia | SUI   | 146107    | 55225 | none  | nontype       | JK16-06      | Dominican Republic | Gurabo Formation     | Late Miocene to Early Pliocene |      |
| Antillophyllia | lonsdaleia | SUI   | 146108    | 55237 | none  | nontype       | JK16-06      | Dominican Republic | Gurabo Formation     | Late Miocene to Early Pliocene |      |
| Antillophyllia | lonsdaleia | SUI   | 146109    | 55262 | none  | nontype       | JK16-06      | Dominican Republic | Gurabo Formation     | Late Miocene to Early Pliocene |      |
| Antillophyllia | lonsdaleia | USNM  | 1456607   | 43101 | none  | nontype       | NMB16828     | Dominican Republic | Gurabo Formation     | Late Miocene to Early Pliocene |      |
| Antillophyllia | lonsdaleia | USNM  | 1456626   | 43103 | none  | nontype       | NMB16828     | Dominican Republic | Gurabo Formation     | Late Miocene to Early Pliocene |      |
| Antillophyllia | lonsdaleia | USNM  | 1456611   | 43104 | none  | nontype       | NMB16828     | Dominican Republic | Gurabo Formation     | Late Miocene to Early Pliocene |      |
| Antillophyllia | lonsdaleia | USNM  | 1456619   | 43109 | none  | nontype       | NMB16828     | Dominican Republic | Gurabo Formation     | Late Miocene to Early Pliocene |      |
| Antillophyllia | lonsdaleia | USNM  | 1456616   | 43118 | none  | nontype       | NMB16828     | Dominican Republic | Gurabo Formation     | Late Miocene to Early Pliocene |      |
| Antillophyllia | lonsdaleia | USNM  | 1456624   | 43210 | none  | nontype       | NMB16828     | Dominican Republic | Gurabo Formation     | Late Miocene to Early Pliocene |      |
| Antillophyllia | lonsdaleia | USNM  | 1456605   | 43238 | none  | nontype       | NMB16828     | Dominican Republic | Gurabo Formation     | Late Miocene to Early Pliocene |      |
| Antillophyllia | lonsdaleia | USNM  | 1456608   | 43239 | none  | nontype       | NMB16828     | Dominican Republic | Gurabo Formation     | Late Miocene to Early Pliocene |      |
| Antillophyllia | lonsdaleia | USNM  | 1456622   | 44824 | none  | nontype       | NMB16137     | Dominican Republic | Gurabo Formation     | Late Miocene to Early Pliocene |      |
| Antillophyllia | lonsdaleia | USNM  | 1456606   | 44826 | none  | nontype       | NMB16137     | Dominican Republic | Gurabo Formation     | Late Miocene to Early Pliocene |      |
| Antillophyllia | lonsdaleia | SUI   | 146110    | 55137 | none  | nontype       | JK16-08      | Dominican Republic | Gurabo/Mao Formation | Early Pliocene                 |      |
| Antillophyllia | lonsdaleia | SUI   | 146111    | 49170 | none  | nontype       | NMB16873     | Dominican Republic | Mao Formation        | Early Pliocene                 |      |
| Antillophyllia | lonsdaleia | SUI   | 146112    | 47158 | none  | nontype       | JK08-28      | Dominican Republic | Mao Formation        | Early Pliocene                 |      |
| Antillophyllia | lonsdaleia | NHMUK | PI R28750 | none  | none  | lectotype     | Nivajé Shale | Dominican Republic | unknown              | Neogene                        | 9A,D |
| Antillophyllia | lonsdaleia | NHMUK | PI R28751 | none  | none  | paralectotype | Nivajé Shale | Dominican Republic | unknown              | Neogene                        |      |
| Antillophyllia | lonsdaleia | NHMUK | PI R28752 | none  | none  | paralectotype | Nivajé Shale | Dominican Republic | unknown              | Neogene                        |      |
| Antillophyllia | lonsdaleia | SUI   | 128554    | 50220 | none  | nontype       | CM-08-6      | Panama             | Old Bank Formation   | Late Miocene                   |      |

**Supplemental Appendix A.** List of all specimens studied.

|                |            |      |         |       |        |                                      |           |                    |                               |                                |       |
|----------------|------------|------|---------|-------|--------|--------------------------------------|-----------|--------------------|-------------------------------|--------------------------------|-------|
| Antillophyllia | lonsdaleia | SUI  | 128012  | 46352 | none   | nontype                              | CM-06-24  | Panama             | Uraccá Formation              | Early Pleistocene              |       |
| Antillophyllia | lonsdaleia | USNM | M353652 | none  | none   | holotype of <i>Antillia sawkinsi</i> | USGS 8299 | Trinidad           | Manzanilla Formation          | Late Miocene                   | 9B,E  |
| Antillophyllia | lonsdaleia | USNM | 72808   | none  | 72808  | figured                              | USGS9217  | Trinidad           | Manzanilla Formation          | Late Miocene                   | 9G    |
| Isophyllia     | jacksoni   | SUI  | 137214  | 9594  | none   | paratype                             | AB95-50   | Curacao            | Seroe Domi Formation (ridges) | Early Pliocene                 |       |
| Isophyllia     | jacksoni   | SUI  | 106898  | 44874 | 44874  | paratype                             | BK07-12   | Dominican Republic | Cercado Formation             | Late Miocene                   |       |
| Isophyllia     | jacksoni   | SUI  | 106902  | 44876 | 106902 | paratype                             | JK06-19   | Dominican Republic | Cercado Formation             | Late Miocene                   |       |
| Isophyllia     | jacksoni   | USNM | 1480738 | 44863 | none   | nontype                              | JK06-17   | Dominican Republic | Cercado Formation             | Late Miocene                   |       |
| Isophyllia     | jacksoni   | USNM | 1480739 | 44864 | none   | nontype                              | JK06-19   | Dominican Republic | Cercado Formation             | Late Miocene                   |       |
| Isophyllia     | jacksoni   | USNM | 1480740 | 44865 | none   | nontype                              | JK06-19   | Dominican Republic | Cercado Formation             | Late Miocene                   |       |
| Isophyllia     | jacksoni   | USNM | 1480741 | 44866 | none   | nontype                              | JK06-19   | Dominican Republic | Cercado Formation             | Late Miocene                   |       |
| Isophyllia     | jacksoni   | USNM | 1480742 | 44867 | none   | nontype                              | JK06-19   | Dominican Republic | Cercado Formation             | Late Miocene                   |       |
| Isophyllia     | jacksoni   | USNM | 1480743 | 44868 | none   | nontype                              | JK06-19   | Dominican Republic | Cercado Formation             | Late Miocene                   |       |
| Isophyllia     | jacksoni   | USNM | 1480744 | 44869 | none   | nontype                              | JK06-18   | Dominican Republic | Cercado Formation             | Late Miocene                   |       |
| Isophyllia     | jacksoni   | USNM | 1480745 | 44871 | none   | nontype                              | JK06-19   | Dominican Republic | Cercado Formation             | Late Miocene                   |       |
| Isophyllia     | jacksoni   | USNM | 1480746 | 44872 | none   | nontype                              | JK06-19   | Dominican Republic | Cercado Formation             | Late Miocene                   |       |
| Isophyllia     | jacksoni   | USNM | 1480747 | 44873 | none   | nontype                              | JK06-19   | Dominican Republic | Cercado Formation             | Late Miocene                   |       |
| Isophyllia     | jacksoni   | NMB  | D6614   | 10001 | none   | figured                              | NMB15838  | Dominican Republic | Gurabo Formation              | Late Miocene to Early Pliocene | 11B,C |
| Isophyllia     | jacksoni   | SUI  | 146113  | 47680 | none   | nontype                              | NMB15837  | Dominican Republic | Gurabo Formation              | Late Miocene to Early Pliocene |       |
| Isophyllia     | jacksoni   | SUI  | 146114  | 49277 | none   | holotype                             | JK09-4    | Dominican Republic | Gurabo Formation              | Late Miocene to Early Pliocene | 11A   |
| Isophyllia     | jacksoni   | SUI  | 146115  | 49279 | none   | nontype                              | JK09-4    | Dominican Republic | Gurabo Formation              | Late Miocene to Early Pliocene |       |
| Isophyllia     | jacksoni   | SUI  | 146116  | 49506 | none   | nontype                              | JK09-4    | Dominican Republic | Gurabo Formation              | Late Miocene to Early Pliocene |       |
| Isophyllia     | jacksoni   | SUI  | 146117  | 54747 | none   | nontype                              | BB-15-83  | Dominican Republic | Gurabo Formation              | Late Miocene to Early Pliocene |       |
| Isophyllia     | jacksoni   | SUI  | 146118  | 54748 | none   | nontype                              | BB-15-84  | Dominican Republic | Gurabo Formation              | Late Miocene to Early Pliocene |       |
| Isophyllia     | jacksoni   | SUI  | 146119  | 54752 | none   | nontype                              | BB-15-84  | Dominican Republic | Gurabo Formation              | Late Miocene to Early Pliocene |       |
| Isophyllia     | jacksoni   | SUI  | 146120  | 54753 | none   | nontype                              | BB-15-83  | Dominican Republic | Gurabo Formation              | Late Miocene to Early Pliocene |       |
| Isophyllia     | jacksoni   | SUI  | 146121  | 54754 | none   | nontype                              | BB-15-84  | Dominican Republic | Gurabo Formation              | Late Miocene to Early Pliocene |       |
| Isophyllia     | jacksoni   | SUI  | 146122  | 54755 | none   | nontype                              | BB-15-83  | Dominican Republic | Gurabo Formation              | Late Miocene to Early Pliocene |       |
| Isophyllia     | jacksoni   | SUI  | 146123  | 54757 | none   | nontype                              | BB-15-84  | Dominican Republic | Gurabo Formation              | Late Miocene to Early Pliocene |       |
| Isophyllia     | jacksoni   | USNM | 1480748 | 42481 | none   | nontype                              | NMB16859  | Dominican Republic | Gurabo Formation              | Late Miocene to Early Pliocene |       |
| Isophyllia     | jacksoni   | USNM | 1480749 | 44870 | none   | nontype                              | NMB16823  | Dominican Republic | Gurabo Formation              | Late Miocene to Early Pliocene |       |
| Isophyllia     | jacksoni   | USNM | 1480750 | 40374 | none   | nontype                              | NMB15894  | Dominican Republic | Gurabo Formation              | Late Miocene to Early Pliocene |       |
| Isophyllia     | jacksoni   | USNM | 1480751 | 42023 | none   | nontype                              | NMB15888  | Dominican Republic | Gurabo Formation              | Late Miocene to Early Pliocene |       |
| Isophyllia     | jacksoni   | SUI  | 146124  | 51281 | none   | nontype                              | BC13-21T  | Dominican Republic | Los Haitises Formation        | Early Pleistocene              |       |
| Isophyllia     | jacksoni   | SUI  | 146125  | 51550 | none   | nontype                              | BC13-58C  | Dominican Republic | Los Haitises Formation        | Early Pleistocene              |       |
| Isophyllia     | jacksoni   | SUI  | 146126  | 51553 | none   | nontype                              | BC13-58C  | Dominican Republic | Los Haitises Formation        | Early Pleistocene              |       |
| Isophyllia     | jacksoni   | SUI  | 146127  | 51572 | none   | nontype                              | BC13-58C  | Dominican Republic | Los Haitises Formation        | Early Pleistocene              |       |
| Isophyllia     | jacksoni   | SUI  | 146128  | 52096 | none   | nontype                              | BC13-15C  | Dominican Republic | Los Haitises Formation        | Early Pleistocene              |       |
| Isophyllia     | jacksoni   | SUI  | 146129  | 52141 | none   | nontype                              | BC13-15C  | Dominican Republic | Los Haitises Formation        | Early Pleistocene              |       |
| Isophyllia     | jacksoni   | SUI  | 146130  | 47444 | none   | nontype                              | NMB17023  | Dominican Republic | Mao Formation                 | Early Pliocene                 |       |
| Isophyllia     | jacksoni   | SUI  | 107860  | 42000 | 107860 | paratype                             | NMB16884  | Dominican Republic | Mao Formation                 | Early Pliocene                 |       |
| Isophyllia     | jacksoni   | SUI  | 108013  | 42004 | none   | nontype                              | NMB16884  | Dominican Republic | Mao Formation                 | Early Pliocene                 |       |

**Supplemental Appendix A.** List of all specimens studied.

|            |          |      |         |       |        |          |           |                    |                        |                                |       |
|------------|----------|------|---------|-------|--------|----------|-----------|--------------------|------------------------|--------------------------------|-------|
| Isophyllia | jacksoni | SUI  | 108025  | 42189 | 42189  | paratype | NMB16884  | Dominican Republic | Mao Formation          | Early Pliocene                 |       |
| Isophyllia | jacksoni | SUI  | 106907  | 44878 | 106907 | paratype | NMB16884  | Dominican Republic | Mao Formation          | Early Pliocene                 |       |
| Isophyllia | jacksoni | SUI  | 146131  | 47018 | none   | nontype  | JK08-15   | Dominican Republic | Mao Formation          | Early Pliocene                 |       |
| Isophyllia | jacksoni | SUI  | 146132  | 47306 | none   | nontype  | JK08-15   | Dominican Republic | Mao Formation          | Early Pliocene                 |       |
| Isophyllia | jacksoni | SUI  | 140419  | 47496 | 47496  | paratype | JK08-26T  | Dominican Republic | Mao Formation          | Early Pliocene                 | 11D-F |
| Isophyllia | jacksoni | SUI  | 146133  | 47544 | none   | nontype  | JK08-24   | Dominican Republic | Mao Formation          | Early Pliocene                 |       |
| Isophyllia | jacksoni | SUI  | 146134  | 47553 | none   | nontype  | JK08-18   | Dominican Republic | Mao Formation          | Early Pliocene                 |       |
| Isophyllia | jacksoni | SUI  | 146135  | 47623 | none   | nontype  | JK08-30   | Dominican Republic | Mao Formation          | Early Pliocene                 |       |
| Isophyllia | jacksoni | SUI  | 108012  | 42001 | none   | nontype  | NMB16884  | Dominican Republic | Mao Formation          | Early Pliocene                 |       |
| Isophyllia | jacksoni | SUI  | 108013  | 42002 | 108013 | paratype | NMB16884  | Dominican Republic | Mao Formation          | Early Pliocene                 |       |
| Isophyllia | jacksoni | USNM | 1480752 | 42178 | none   | nontype  | NMB16884  | Dominican Republic | Mao Formation          | Early Pliocene                 |       |
| Isophyllia | jacksoni | USNM | 1480753 | 42183 | none   | nontype  | NMB16884  | Dominican Republic | Mao Formation          | Early Pliocene                 |       |
| Isophyllia | jacksoni | USNM | 1480754 | 42185 | none   | nontype  | NMB16884  | Dominican Republic | Mao Formation          | Early Pliocene                 |       |
| Isophyllia | jacksoni | USNM | 1480755 | 42186 | none   | nontype  | NMB16884  | Dominican Republic | Mao Formation          | Early Pliocene                 |       |
| Isophyllia | jacksoni | SUI  | 146136  | 47118 | none   | nontype  | JK08-21   | Dominican Republic | Mao Formation          | Early Pliocene                 |       |
| Isophyllia | jacksoni | SUI  | 146137  | 47512 | none   | nontype  | JK08-24   | Dominican Republic | Mao Formation          | Early Pliocene                 |       |
| Isophyllia | jacksoni | SUI  | 146138  | 47713 | none   | nontype  | JK08-19   | Dominican Republic | Mao Formation          | Early Pliocene                 |       |
| Isophyllia | maoensis | SUI  | 107983  | 42540 | 42540  | paratype | KB05-05   | Dominican Republic | Cercado Formation      | Late Miocene                   | 12D-F |
| Isophyllia | maoensis | SUI  | 106899  | 44875 | 44875  | paratype | AB87-CAB  | Dominican Republic | Cercado Formation      | Late Miocene                   |       |
| Isophyllia | maoensis | SUI  | 106901  | 43646 | 106901 | paratype | JK06-48T  | Dominican Republic | Gurabo Formation       | Late Miocene to Early Pliocene |       |
| Isophyllia | maoensis | USNM | 1480756 | 41073 | none   | nontype  | NMB16859  | Dominican Republic | Gurabo Formation       | Late Miocene to Early Pliocene |       |
| Isophyllia | maoensis | SUI  | 140420  | 47046 | 47046  | paratype | JK08-12   | Dominican Republic | Mao Formation          | Early Pliocene                 |       |
| Isophyllia | maoensis | SUI  | 137218  | 47047 | none   | paratype | JK08-12   | Dominican Republic | Mao Formation          | Early Pliocene                 |       |
| Isophyllia | maoensis | SUI  | 146139  | 47121 | none   | nontype  | JK08-21   | Dominican Republic | Mao Formation          | Early Pliocene                 |       |
| Isophyllia | maoensis | NMB  | D6610   | 10025 | none   | figured  | NMB16884  | Dominican Republic | Mao Formation          | Early Pliocene                 | 12C   |
| Isophyllia | maoensis | SUI  | 146140  | 47050 | none   | holotype | JK08-19   | Dominican Republic | Mao Formation          | Early Pliocene                 | 12A,B |
| Isophyllia | maoensis | SUI  | 146141  | 47499 | none   | nontype  | JK08-24   | Dominican Republic | Mao Formation          | Early Pliocene                 |       |
| Isophyllia | maoensis | SUI  | 146142  | 47561 | none   | nontype  | JK08-18   | Dominican Republic | Mao Formation          | Early Pliocene                 |       |
| Isophyllia | maoensis | SUI  | 128771  | 49666 | 49666  | paratype | JK09-10C  | Panama             | Isla Colon Formation   | Early Pleistocene              |       |
| Isophyllia | rigida   | SUI  | 102835  | 3531  | none   | nontype  | JW93-1    | Costa Rica         | Moin Formation         | Early Pleistocene              |       |
| Isophyllia | rigida   | SUI  | 118708  | 3534  | 3534   | nontype  | AB93-24   | Costa Rica         | Moin Formation         | Early Pleistocene              |       |
| Isophyllia | rigida   | SUI  | 102842  | 3527  | none   | figured  | AB93-34   | Costa Rica         | Q.Chocolate Formation  | Late Pliocene                  | 11G   |
| Isophyllia | rigida   | USNM | 1480757 | 4082  | none   | nontype  | AB94-32   | Jamaica            | Falmouth Formation     | Late Pleistocene               |       |
| Isophyllia | rigida   | USNM | 1480758 | 4085  | none   | nontype  | AB94-32   | Jamaica            | Falmouth Formation     | Late Pleistocene               |       |
| Isophyllia | rigida   | USNM | 1480759 | 4086  | none   | nontype  | AB94-32   | Jamaica            | Falmouth Formation     | Late Pleistocene               |       |
| Isophyllia | rigida   | USNM | 1480760 | 4087  | none   | nontype  | AB94-32   | Jamaica            | Falmouth Formation     | Late Pleistocene               |       |
| Isophyllia | rigida   | USNM | 1480761 | 4656  | none   | nontype  | AB94-23   | Jamaica            | Manchioneal Formation  | Early Pleistocene              |       |
| Isophyllia | rigida   | SUI  | 102837  | 30318 | none   | nontype  | AB98-16   | Panama             | Old Bank Formation     | Late Miocene                   |       |
| Isophyllia | sinuosa  | USNM | 1485184 | 3554  | none   | figured  | AB93-71   | Costa Rica         | Moin Formation         | Early Pleistocene              | 11H   |
| Isophyllia | sinuosa  | SUI  | 146143  | 49687 | none   | nontype  | JK09-31   | Dominican Republic | Los Haitises Formation | Early Pleistocene              |       |
| Isophyllia | sinuosa  | SUI  | 146144  | 49690 | none   | nontype  | JK09-31   | Dominican Republic | Los Haitises Formation | Early Pleistocene              |       |
| Isophyllia | sinuosa  | USNM | 1437457 | none  | none   | figured  | CF002     | Florida            | Tamiami Formation      | Late Pliocene                  | 11I   |
| Isophyllia | sinuosa  | USNM | 1480762 | 4083  | none   | nontype  | AB94-32   | Jamaica            | Falmouth Formation     | Late Pleistocene               |       |
| Isophyllia | sinuosa  | SUI  | 146145  | 46259 | none   | nontype  | CM-06-20  | Panama             | Isla Colon Formation   | Early Pleistocene              |       |
| Isophyllia | sinuosa  | SUI  | 146146  | 49651 | none   | nontype  | CM-09-6   | Panama             | Isla Colon Formation   | Early Pleistocene              |       |
| Isophyllia | sinuosa  | SUI  | 146147  | 49652 | none   | nontype  | CM-09-6   | Panama             | Isla Colon Formation   | Early Pleistocene              |       |
| Isophyllia | sinuosa  | SUI  | 146148  | 49653 | none   | nontype  | CM-09-6   | Panama             | Isla Colon Formation   | Early Pleistocene              |       |
| Isophyllia | sinuosa  | SUI  | 146149  | 49654 | none   | nontype  | CM-09-6   | Panama             | Isla Colon Formation   | Early Pleistocene              |       |
| Mussa      | angulosa | USNM | 1480763 | 0093  | none   | nontype  | CJ92-6(3) | Costa Rica         | Moin Formation         | Early Pleistocene              |       |

**Supplemental Appendix A.** List of all specimens studied.

|               |            |      |         |       |        |          |           |                    |                                  |                    |       |
|---------------|------------|------|---------|-------|--------|----------|-----------|--------------------|----------------------------------|--------------------|-------|
| Mussa         | angulosa   | USNM | 1480764 | 3532  | none   | nontype  | KJ-LM(2)  | Costa Rica         | Moin Formation                   | Early Pleistocene  |       |
| Mussa         | angulosa   | USNM | 96887   | 3549  | none   | nontype  | AB93-71   | Costa Rica         | Moin Formation                   | Early Pleistocene  |       |
| Mussa         | angulosa   | USNM | 1480765 | 3550  | none   | figured  | AB93-71   | Costa Rica         | Moin Formation                   | Early Pleistocene  | 6A,D  |
| Mussa         | angulosa   | USNM | 1480766 | 3562  | none   | nontype  | AB93-71   | Costa Rica         | Moin Formation                   | Early Pleistocene  |       |
| Mussa         | angulosa   | USNM | 1480767 | 3565  | none   | nontype  | KJ-LM(1)  | Costa Rica         | Moin Formation                   | Early Pleistocene  |       |
| Mussa         | angulosa   | USNM | 96880   | 3573  | none   | nontype  | AB93-41   | Costa Rica         | Moin Formation                   | Early Pleistocene  |       |
| Mussa         | angulosa   | USNM | 1480768 | 3557  | none   | nontype  | AB93-06   | Costa Rica         | Q.Chocolate Formation            | Late Pliocene      |       |
| Mussa         | angulosa   | USNM | 96876   | 3569  | none   | nontype  | AB93-38   | Costa Rica         | Q.Chocolate Formation            | Late Pliocene      |       |
| Mussa         | angulosa   | NMB  | D6609   | none  | none   | figured  | NMB16905  | Dominican Republic | Enriquillo Valley                | Holocene           | 6B,E  |
| Mussa         | angulosa   | SUI  | 146150  | 47566 | none   | nontype  | JK08-18   | Dominican Republic | Mao Formation                    | Early Pliocene     |       |
| Mussa         | angulosa   | SUI  | 146151  | 47642 | none   | nontype  | JK08-30   | Dominican Republic | Mao Formation                    | Early Pliocene     |       |
| Mussa         | angulosa   | SUI  | 146152  | 53520 | 53520  | figured  | CF003     | Florida            | Tamiami Formation                | Late Pliocene      | 6C,F  |
| Mussa         | angulosa   | USNM | 1480769 | 4639  | none   | nontype  | AB94-27   | Jamaica            | Manchioneal Formation            | Early Pleistocene  |       |
| Mussa         | angulosa   | USNM | 1480770 | 4640  | none   | nontype  | AB94-64   | Jamaica            | Manchioneal Formation            | Early Pleistocene  |       |
| Mycetophyllia | aliciae    | USNM | 1480771 | 0139  | none   | nontype  | CJ92-6(3) | Costa Rica         | Moin Formation                   | Early Pleistocene  |       |
| Mycetophyllia | aliciae    | USNM | 1480772 | 3568  | none   | nontype  | KJ-LM(3)  | Costa Rica         | Moin Formation                   | Early Pleistocene  |       |
| Mycetophyllia | aliciae    | USNM | 1480773 | 6971  | none   | nontype  | AB95-08   | Costa Rica         | Moin Formation                   | Early Pleistocene  |       |
| Mycetophyllia | aliciae    | USNM | 1480774 | 6979  | none   | figured  | AB95-08   | Costa Rica         | Moin Formation                   | Early Pleistocene  | 13D   |
| Mycetophyllia | aliciae    | SUI  | 146153  | 47588 | none   | nontype  | JK08-18   | Dominican Republic | Mao Formation                    | Early Pliocene     |       |
| Mycetophyllia | bullbrooki | USNM | 1480779 | 9252  | none   | nontype  | RP95-05   | Curacao            | Seroe Domi Formation (flatiron)  | Middle Miocene     |       |
| Mycetophyllia | bullbrooki | USNM | 1480775 | 9251  | none   | nontype  | AB95-35   | Curacao            | Seroe Domi Formation (ridges)    | Early Pliocene     |       |
| Mycetophyllia | bullbrooki | USNM | 1480776 | 9253  | none   | nontype  | AB95-50   | Curacao            | Seroe Domi Formation (ridges)    | Early Pliocene     |       |
| Mycetophyllia | bullbrooki | USNM | 1480777 | 9590  | none   | nontype  | AB95-35   | Curacao            | Seroe Domi Formation (ridges)    | Early Pliocene     |       |
| Mycetophyllia | bullbrooki | USNM | 1480778 | 9589b | none   | nontype  | AB95-35   | Curacao            | Seroe Domi Formation (ridges)    | Early Pliocene     |       |
| Mycetophyllia | bullbrooki | USNM | 1480780 | 40161 | none   | nontype  | Evans-S12 | Dominican Republic | Cercado Formation                | Late Miocene       |       |
| Mycetophyllia | bullbrooki | USNM | 1480781 | 40270 | none   | nontype  | Evans-S4  | Dominican Republic | Cercado Formation                | Late Miocene       |       |
| Mycetophyllia | bullbrooki | SUI  | 146154  | 48031 | none   | nontype  | JK06-01   | Dominican Republic | Mao Formation                    | Early Pliocene     |       |
| Mycetophyllia | bullbrooki | SUI  | 127918  | 46164 | none   | nontype  | CM-06-15  | Panama             | Uraccá Formation                 | Early Pleistocene  |       |
| Mycetophyllia | bullbrooki | SUI  | 127919  | 46166 | none   | nontype  | CM-06-15  | Panama             | Uraccá Formation                 | Early Pleistocene  |       |
| Mycetophyllia | bullbrooki | SUI  | 127920  | 46167 | none   | nontype  | CM-06-15  | Panama             | Uraccá Formation                 | Early Pleistocene  |       |
| Mycetophyllia | bullbrooki | USNM | M353663 | none  | 353663 | holotype | USGS8299  | Trinidad           | Manzanilla Formation             | Late Miocene       | 13F-H |
| Mycetophyllia | danaana    | USNM | 1480782 | 0066  | none   | nontype  | CJ92-6(1) | Costa Rica         | Moin Formation                   | Early Pleistocene  |       |
| Mycetophyllia | danaana    | USNM | 1480783 | 0274  | none   | nontype  | CJ89-17   | Costa Rica         | Moin Formation                   | Early Pleistocene  |       |
| Mycetophyllia | danaana    | USNM | 1480784 | 0729  | none   | nontype  | KJ-LM(1)  | Costa Rica         | Moin Formation                   | Early Pleistocene  |       |
| Mycetophyllia | danaana    | USNM | 1480785 | 0730  | none   | nontype  | KJ-LM(1)  | Costa Rica         | Moin Formation                   | Early Pleistocene  |       |
| Mycetophyllia | danaana    | USNM | 1480786 | 0733  | none   | nontype  | KJ-LM(3)  | Costa Rica         | Moin Formation                   | Early Pleistocene  |       |
| Mycetophyllia | danaana    | USNM | 96886   | 1058  | none   | nontype  | KJ-LM(3)  | Costa Rica         | Moin Formation                   | Early Pleistocene  |       |
| Mycetophyllia | danaana    | USNM | 1480787 | 3523  | none   | nontype  | KJ-LM(1)  | Costa Rica         | Moin Formation                   | Early Pleistocene  |       |
| Mycetophyllia | danaana    | USNM | 1480788 | 3528  | none   | nontype  | AB93-23   | Costa Rica         | Moin Formation                   | Early Pleistocene  |       |
| Mycetophyllia | danaana    | USNM | 96888   | 3535  | none   | nontype  | AB93-71   | Costa Rica         | Moin Formation                   | Early Pleistocene  |       |
| Mycetophyllia | danaana    | USNM | 96891   | 3566  | none   | nontype  | AB93-71   | Costa Rica         | Moin Formation                   | Early Pleistocene  |       |
| Mycetophyllia | danaana    | USNM | 1480789 | 3571  | none   | nontype  | AB93-23   | Costa Rica         | Moin Formation                   | Early Pleistocene  |       |
| Mycetophyllia | danaana    | USNM | 1480790 | 3572  | none   | nontype  | AB93-23   | Costa Rica         | Moin Formation                   | Early Pleistocene  |       |
| Mycetophyllia | danaana    | USNM | 1480791 | 6970  | none   | nontype  | AB95-08   | Costa Rica         | Moin Formation                   | Early Pleistocene  |       |
| Mycetophyllia | danaana    | USNM | 1480792 | 6974  | none   | nontype  | AB95-08   | Costa Rica         | Moin Formation                   | Early Pleistocene  |       |
| Mycetophyllia | danaana    | USNM | 1480793 | 6980  | none   | nontype  | AB95-08   | Costa Rica         | Moin Formation                   | Early Pleistocene  |       |
| Mycetophyllia | danaana    | USNM | 1480794 | 6981  | none   | nontype  | AB95-08   | Costa Rica         | Moin Formation                   | Early Pleistocene  |       |
| Mycetophyllia | danaana    | USNM | 1480795 | 9257  | none   | nontype  | AB95-40   | Curacao            | Lower Terrace                    | Late Pleistocene   |       |
| Mycetophyllia | danaana    | USNM | 1480796 | 9259  | none   | nontype  | AB95-40   | Curacao            | Lower Terrace                    | Late Pleistocene   |       |
| Mycetophyllia | danaana    | USNM | 1480797 | 9261  | none   | nontype  | AB95-40   | Curacao            | Lower Terrace                    | Late Pleistocene   |       |
| Mycetophyllia | danaana    | USNM | 1480798 | 9283  | none   | nontype  | AB95-40   | Curacao            | Lower Terrace                    | Late Pleistocene   |       |
| Mycetophyllia | danaana    | USNM | 1480799 | 9255  | none   | nontype  | AB95-80   | Curacao            | Middle Terrace                   | Middle Pleistocene |       |
| Mycetophyllia | danaana    | USNM | 1480800 | 9262  | none   | nontype  | AB95-80   | Curacao            | Middle Terrace                   | Middle Pleistocene |       |
| Mycetophyllia | danaana    | USNM | 1480801 | 9260  | none   | nontype  | AB95-60   | Curacao            | Seroe Domi Formation (ridges)    | Early Pliocene     |       |
| Mycetophyllia | danaana    | USNM | 1480802 | 9254  | none   | nontype  | AB95-23   | Curacao            | Seroe Domi Formation (sea cliff) | Early Pleistocene  |       |
| Mycetophyllia | danaana    | USNM | 1480803 | 9256  | none   | nontype  | AB95-21   | Curacao            | Seroe Domi Formation (sea cliff) | Early Pleistocene  |       |
| Mycetophyllia | danaana    | SUI  | 146155  | 47005 | none   | nontype  | NMB17023  | Dominican Republic | Mao Formation                    | Early Pliocene     |       |
| Mycetophyllia | danaana    | USNM | 1480804 | 4804  | none   | figured  | AB94-32   | Jamaica            | Falmouth Formation               | Late Pleistocene   | 13E   |
| Mycetophyllia | danaana    | USNM | 1480805 | 4633  | none   | nontype  | AB94-24   | Jamaica            | Manchioneal Formation            | Early Pleistocene  |       |



**Supplemental Appendix A.** List of all specimens studied.

|               |             |      |         |       |      |         |           |                    |                        |                   |     |
|---------------|-------------|------|---------|-------|------|---------|-----------|--------------------|------------------------|-------------------|-----|
| Mycetophyllia | danaana     | USNM | 1480806 | 4657  | none | nontype | AB94-24   | Jamaica            | Manchioneal Formation  | Early Pleistocene |     |
| Mycetophyllia | danaana     | USNM | 1480807 | 4658  | none | nontype | AB94-62   | Jamaica            | Manchioneal Formation  | Early Pleistocene |     |
| Mycetophyllia | danaana     | USNM | 1480808 | 4644  | none | nontype | AB94-59   | Jamaica            | Manchioneal Formation  | Early Pleistocene |     |
| Mycetophyllia | danaana     | USNM | 1480809 | 30007 | none | nontype | AB98-18   | Panama             | Old Bank Formation     | Late Miocene      |     |
| Mycetophyllia | danaana     | USNM | 1480810 | 30307 | none | nontype | AB98-13   | Panama             | Old Bank Formation     | Late Miocene      |     |
| Mycetophyllia | danaana     | USNM | 96889   | 3541  | none | nontype | AB93-80   | Panama             | Isla Colon Formation   | Early Pleistocene |     |
| Mycetophyllia | danaana     | SUI  | 128042  | 46178 | none | nontype | CM-06-24  | Panama             | Uraccá Formation       | Early Pleistocene |     |
| Mycetophyllia | danaana     | SUI  | 128043  | 46179 | none | nontype | CM-06-24  | Panama             | Uraccá Formation       | Early Pleistocene |     |
| Mycetophyllia | danaana     | SUI  | 128044  | 46219 | none | nontype | CM-06-24  | Panama             | Uraccá Formation       | Early Pleistocene |     |
| Mycetophyllia | danaana     | SUI  | 128334  | 46578 | none | nontype | CM-07-10  | Panama             | Uraccá Formation       | Early Pleistocene |     |
| Mycetophyllia | ferox       | USNM | 1480811 | 0025  | none | nontype | CJ92-6(1) | Costa Rica         | Moin Formation         | Early Pleistocene |     |
| Mycetophyllia | ferox       | USNM | 1480812 | 0060  | none | nontype | CJ92-6(1) | Costa Rica         | Moin Formation         | Early Pleistocene |     |
| Mycetophyllia | ferox       | USNM | 97025   | 0313  | none | nontype | CJ89-17   | Costa Rica         | Moin Formation         | Early Pleistocene |     |
| Mycetophyllia | ferox       | USNM | 1480813 | 0699  | none | nontype | KJ-P2     | Costa Rica         | Moin Formation         | Early Pleistocene |     |
| Mycetophyllia | ferox       | USNM | 1480814 | 0949  | none | figured | KJ-P2     | Costa Rica         | Moin Formation         | Early Pleistocene | 13C |
| Mycetophyllia | ferox       | USNM | 1480815 | 3526  | none | nontype | AB93-23   | Costa Rica         | Moin Formation         | Early Pleistocene |     |
| Mycetophyllia | ferox       | USNM | 1480816 | 3539  | none | nontype | AB93-23   | Costa Rica         | Moin Formation         | Early Pleistocene |     |
| Mycetophyllia | ferox       | USNM | 96932   | 3540  | none | nontype | AB93-71   | Costa Rica         | Moin Formation         | Early Pleistocene |     |
| Mycetophyllia | ferox       | USNM | 1480817 | 3553  | none | nontype | AB93-23   | Costa Rica         | Moin Formation         | Early Pleistocene |     |
| Mycetophyllia | ferox       | USNM | 96928   | 3556  | none | nontype | AB93-23   | Costa Rica         | Moin Formation         | Early Pleistocene |     |
| Mycetophyllia | ferox       | USNM | 1480818 | 3570  | none | nontype | KJ-LM(2)  | Costa Rica         | Moin Formation         | Early Pleistocene |     |
| Mycetophyllia | ferox       | USNM | 96930   | 3292  | none | nontype | AB93-41   | Costa Rica         | Moin Formation         | Early Pleistocene |     |
| Mycetophyllia | ferox       | SUI  | 146156  | 47049 | none | nontype | NMB17023  | Dominican Republic | Mao Formation          | Early Pliocene    |     |
| Mycetophyllia | ferox       | USNM | 1480819 | 30492 | none | nontype | AB99-10   | Panama             | Isla Colon Formation   | Early Pleistocene |     |
| Mycetophyllia | ferox       | USNM | 1480820 | 30494 | none | nontype | AB99-10   | Panama             | Isla Colon Formation   | Early Pleistocene |     |
| Mycetophyllia | ferox       | USNM | 1480821 | 3542  | none | nontype | AB93-74   | Panama             | Isla Colon Formation   | Early Pleistocene |     |
| Mycetophyllia | lamarckiana | USNM | 1480822 | 0181  | none | figured | CJ92-6(3) | Costa Rica         | Moin Formation         | Early Pleistocene | 13A |
| Mycetophyllia | lamarckiana | USNM | 96904   | 3294  | none | nontype | AB93-23   | Costa Rica         | Moin Formation         | Early Pleistocene |     |
| Mycetophyllia | lamarckiana | USNM | 1480823 | 3533  | none | nontype | KJ-LM(1)  | Costa Rica         | Moin Formation         | Early Pleistocene |     |
| Mycetophyllia | lamarckiana | USNM | 1480824 | 3537  | none | nontype | AB93-48   | Costa Rica         | Moin Formation         | Early Pleistocene |     |
| Mycetophyllia | lamarckiana | USNM | 96295   | 3558  | none | nontype | AB93-41   | Costa Rica         | Moin Formation         | Early Pleistocene |     |
| Mycetophyllia | lamarckiana | USNM | 1480825 | 4623  | none | nontype | AB94-87   | Jamaica            | Hope Gate Formation    | Early Pleistocene |     |
| Mycetophyllia | lamarckiana | USNM | 1480826 | 4650  | none | nontype | AB94-64   | Jamaica            | Manchioneal Formation  | Early Pleistocene |     |
| Mycetophyllia | lamarkiana  | SUI  | 146157  | 51541 | none | nontype | BC13-58C  | Dominican Republic | Los Haitises Formation | Early Pleistocene |     |
| Mycetophyllia | lamarkiana  | SUI  | 146158  | 51563 | none | nontype | BC13-58C  | Dominican Republic | Los Haitises Formation | Early Pleistocene |     |
| Mycetophyllia | reesi       | USNM | 97035   | 0176  | none | nontype | CJ92-6(3) | Costa Rica         | Moin Formation         | Early Pleistocene |     |
| Mycetophyllia | reesi       | USNM | 1480827 | 0197  | none | nontype | CJ92-6(3) | Costa Rica         | Moin Formation         | Early Pleistocene |     |
| Mycetophyllia | reesi       | USNM | 1480828 | 0277  | none | nontype | CJ89-17   | Costa Rica         | Moin Formation         | Early Pleistocene |     |
| Mycetophyllia | reesi       | USNM | 1480829 | 0306  | none | nontype | CJ89-17   | Costa Rica         | Moin Formation         | Early Pleistocene |     |
| Mycetophyllia | reesi       | USNM | 1480830 | 0376  | none | nontype | CJ89-17   | Costa Rica         | Moin Formation         | Early Pleistocene |     |
| Mycetophyllia | reesi       | USNM | 97037   | 0731  | none | nontype | KJ-LM(3)  | Costa Rica         | Moin Formation         | Early Pleistocene |     |
| Mycetophyllia | reesi       | USNM | 1480831 | 0732  | none | nontype | KJ-LM(3)  | Costa Rica         | Moin Formation         | Early Pleistocene |     |
| Mycetophyllia | reesi       | USNM | 97026   | 0735  | none | nontype | KJ-LM(3)  | Costa Rica         | Moin Formation         | Early Pleistocene |     |
| Mycetophyllia | reesi       | USNM | 1480832 | 0738  | none | figured | KJ-LM(2)  | Costa Rica         | Moin Formation         | Early Pleistocene | 13B |
| Mycetophyllia | reesi       | USNM | 97039   | 0740  | none | nontype | KJ-LM(3)  | Costa Rica         | Moin Formation         | Early Pleistocene |     |
| Mycetophyllia | reesi       | USNM | 97043   | 0743  | none | nontype | CJ92-6(3) | Costa Rica         | Moin Formation         | Early Pleistocene |     |
| Mycetophyllia | reesi       | USNM | 1480833 | 0746  | none | nontype | KJ-LM(2)  | Costa Rica         | Moin Formation         | Early Pleistocene |     |
| Mycetophyllia | reesi       | USNM | 97048   | 3524  | none | nontype | AB93-48   | Costa Rica         | Moin Formation         | Early Pleistocene |     |
| Mycetophyllia | reesi       | USNM | 97053   | 3525  | none | nontype | AB93-23   | Costa Rica         | Moin Formation         | Early Pleistocene |     |
| Mycetophyllia | reesi       | USNM | 1480834 | 3529  | none | nontype | AB93-23   | Costa Rica         | Moin Formation         | Early Pleistocene |     |
| Mycetophyllia | reesi       | USNM | 1480835 | 3536  | none | nontype | AB93-71   | Costa Rica         | Moin Formation         | Early Pleistocene |     |
| Mycetophyllia | reesi       | USNM | 97055   | 3545  | none | nontype | AB93-71   | Costa Rica         | Moin Formation         | Early Pleistocene |     |
| Mycetophyllia | reesi       | USNM | 1480836 | 3546  | none | nontype | AB93-71   | Costa Rica         | Moin Formation         | Early Pleistocene |     |
| Mycetophyllia | reesi       | USNM | 97058   | 3548  | none | nontype | AB93-71   | Costa Rica         | Moin Formation         | Early Pleistocene |     |
| Mycetophyllia | reesi       | USNM | 97059   | 3552  | none | nontype | AB93-71   | Costa Rica         | Moin Formation         | Early Pleistocene |     |
| Mycetophyllia | reesi       | USNM | 1480837 | 3559  | none | nontype | AB93-71   | Costa Rica         | Moin Formation         | Early Pleistocene |     |
| Mycetophyllia | reesi       | USNM | 97062   | 3561  | none | nontype | AB93-71   | Costa Rica         | Moin Formation         | Early Pleistocene |     |
| Mycetophyllia | reesi       | USNM | 1480838 | 3564  | none | nontype | AB93-71   | Costa Rica         | Moin Formation         | Early Pleistocene |     |
| Mycetophyllia | reesi       | USNM | 1480839 | 6977  | none | nontype | AB95-08   | Costa Rica         | Moin Formation         | Early Pleistocene |     |
| Mycetophyllia | reesi       | USNM | 1480840 | 6978  | none | nontype | AB95-08   | Costa Rica         | Moin Formation         | Early Pleistocene |     |
| Mycetophyllia | reesi       | USNM | 1480841 | 6986  | none | nontype | AB95-08   | Costa Rica         | Moin Formation         | Early Pleistocene |     |
| Mycetophyllia | reesi       | USNM | 1480842 | 4611  | none | nontype | AB94-86   | Jamaica            | Hope Gate Formation    | Early Pleistocene |     |
| Scolymia      | cubensis    | USNM | 1480843 | 0221  | none | nontype | CJ89-17   | Costa Rica         | Moin Formation         | Early Pleistocene |     |
| Scolymia      | cubensis    | USNM | 1480844 | 0741  | none | nontype | CJ92-6(3) | Costa Rica         | Moin Formation         | Early Pleistocene |     |
| Scolymia      | cubensis    | USNM | 1480845 | 0742  | none | nontype | CJ92-6(3) | Costa Rica         | Moin Formation         | Early Pleistocene |     |
| Scolymia      | cubensis    | USNM | 1480847 | 3547  | none | nontype | AB93-71   | Costa Rica         | Moin Formation         | Early Pleistocene |     |
| Scolymia      | cubensis    | USNM | 96879   | 3551  | none | nontype | AB93-71   | Costa Rica         | Moin Formation         | Early Pleistocene |     |
| Scolymia      | cubensis    | USNM | 1480848 | 3617  | none | nontype | CJ89-17   | Costa Rica         | Moin Formation         | Early Pleistocene |     |
| Scolymia      | cubensis    | USNM | 1480849 | 6093  | none | nontype | AB95-08   | Costa Rica         | Moin Formation         | Early Pleistocene |     |
| Scolymia      | cubensis    | USNM | 1480850 | 6095  | none | nontype | AB95-08   | Costa Rica         | Moin Formation         | Early Pleistocene |     |
| Scolymia      | cubensis    | USNM | 1480851 | 6972  | none | nontype | AB95-08   | Costa Rica         | Moin Formation         | Early Pleistocene |     |
| Scolymia      | cubensis    | USNM | 1480852 | 6973  | none | nontype | AB95-08   | Costa Rica         | Moin Formation         | Early Pleistocene |     |

**Supplemental Appendix A.** List of all specimens studied.

|               |              |      |            |       |       |          |          |                    |                        |                                 |       |
|---------------|--------------|------|------------|-------|-------|----------|----------|--------------------|------------------------|---------------------------------|-------|
| Scolymia      | cubensis     | USNM | 1480853    | 43476 | none  | nontype  | NMB16863 | Dominican Republic | Gurabo Formation       | Late Miocene to Early Pliocene  |       |
| Scolymia      | cubensis     | USNM | 1480854    | 43612 | none  | nontype  | NMB16863 | Dominican Republic | Gurabo Formation       | Late Miocene to Early Pliocene  |       |
| Scolymia      | cubensis     | SUI  | 146159     | 54744 | none  | nontype  | BB-15-83 | Dominican Republic | Gurabo Formation       | Late Miocene to Early Pliocene  |       |
| Scolymia      | cubensis     | SUI  | 146160     | 51466 | none  | nontype  | BC13-38T | Dominican Republic | Los Haitises Formation | Early Pleistocene               |       |
| Scolymia      | cubensis     | USNM | 1454469    | 42944 | none  | nontype  | NMB15822 | Dominican Republic | Mao Formation          | Early Pliocene                  |       |
| Scolymia      | cubensis     | USNM | 107513     | 42179 | none  | nontype  | NMB16884 | Dominican Republic | Mao Formation          | Early Pliocene                  |       |
| Scolymia      | cubensis     | USNM | 107512     | 42188 | none  | nontype  | NMB16884 | Dominican Republic | Mao Formation          | Early Pliocene                  |       |
| Scolymia      | cubensis     | SUI  | 146161     | 53518 | none  | nontype  | CF001    | Florida            | Tamiami Formation      | Late Pliocene                   |       |
| Scolymia      | cubensis     | SUI  | 146162     | 53542 | none  | nontype  | CF001    | Florida            | Tamiami Formation      | Late Pliocene                   |       |
| Scolymia      | cubensis     | SUI  | 146163     | 54009 | none  | nontype  | CF003    | Florida            | Tamiami Formation      | Late Pliocene                   |       |
| Scolymia      | cubensis     | SUI  | 146164     | 54010 | 54010 | figured  | CF003    | Florida            | Tamiami Formation      | Late Pliocene                   | 14E,F |
| Scolymia      | cubensis     | SUI  | 146165     | 54448 | none  | nontype  | CF001    | Florida            | Tamiami Formation      | Late Pliocene                   |       |
| Scolymia      | cubensis     | SUI  | 146166     | 54492 | none  | nontype  | CF001    | Florida            | Tamiami Formation      | Late Pliocene                   |       |
| Scolymia      | cubensis     | SUI  | 146167     | 54494 | none  | figured  | CF001    | Florida            | Tamiami Formation      | Late Pliocene                   | 14D   |
| Scolymia      | cubensis     | USNM | 1480857    | 4769  | none  | nontype  | AB94-02  | Jamaica            | Bowden Formation       | Late Pliocene                   |       |
| Scolymia      | cubensis     | USNM | 1454468    | 5089  | none  | nontype  | AB94-09  | Jamaica            | Old Pera Beds          | Late Pliocene/Early Pleistocene |       |
| Scolymia      | cubensis     | SUI  | 128051     | 46221 | none  | nontype  | CM-06-24 | Panama             | Uracá Formation        | Early Pleistocene               |       |
| Scolymia      | lacera       | SUI  | 118588     | 0224  | none  | nontype  | CJ89-17  | Costa Rica         | Moin Formation         | Early Pleistocene               |       |
| Scolymia      | lacera       | SUI  | 118582     | 3560  | none  | nontype  | AB93-71  | Costa Rica         | Moin Formation         | Early Pleistocene               |       |
| Scolymia      | lacera       | USNM | 1480858    | 42133 | none  | nontype  | NMB15837 | Dominican Republic | Gurabo Formation       | Late Miocene to Early Pliocene  |       |
| Scolymia      | lacera       | SUI  | 146168     | 55269 | none  | nontype  | JK16-06  | Dominican Republic | Gurabo Formation       | Late Miocene to Early Pliocene  |       |
| Scolymia      | lacera       | SUI  | 101409     | 44768 | 44768 | figured  | NMB15808 | Dominican Republic | Gurabo Formation       | Late Miocene to Early Pliocene  | 14C   |
| Scolymia      | lacera       | USNM | 1480859    | 44857 | none  | nontype  | JK06-01  | Dominican Republic | Mao Formation          | Early Pliocene                  |       |
| Scolymia      | lacera       | USNM | 1480860    | 44858 | none  | nontype  | JK06-01  | Dominican Republic | Mao Formation          | Early Pliocene                  |       |
| Scolymia      | lacera       | SUI  | 146169     | 53249 | none  | figured  | CF001    | Florida            | Tamiami Formation      | Late Pliocene                   | 14A,B |
| Scolymia      | lacera       | SUI  | 146170     | 53516 | none  | nontype  | CF001    | Florida            | Tamiami Formation      | Late Pliocene                   |       |
| Scolymia      | lacera       | SUI  | 146171     | 53543 | 53543 | nontype  | CF001    | Florida            | Tamiami Formation      | Late Pliocene                   |       |
| Scolymia      | lacera       | SUI  | 146172     | 53546 | none  | nontype  | CF001    | Florida            | Tamiami Formation      | Late Pliocene                   |       |
| Scolymia      | lacera       | SUI  | 146173     | 54028 | none  | nontype  | CF003    | Florida            | Tamiami Formation      | Late Pliocene                   |       |
| Scolymia      | lacera       | SUI  | 146174     | 54493 | none  | nontype  | CF001    | Florida            | Tamiami Formation      | Late Pliocene                   |       |
| Scolymia      | lacera       | USNM | 1480861    | 4626  | none  | nontype  | AB94-24  | Jamaica            | Manchioneal Formation  | Early Pleistocene               |       |
| Scolymia      | lacera       | USNM | 1480862    | 4636  | none  | nontype  | AB94-16  | Jamaica            | Manchioneal Formation  | Early Pleistocene               |       |
| Scolymia      | meederi      | SUI  | 146175     | 53545 | none  | holotype | CF001    | Florida            | Tamiami Formation      | Late Pliocene                   | 15A,B |
| Scolymia      | meederi      | SUI  | 146176     | 54222 | 54222 | paratype | CF001    | Florida            | Tamiami Formation      | Late Pliocene                   | 15C-F |
| Scolymia      | meederi      | SUI  | 146177     | 54358 | none  | paratype | CF001    | Florida            | Tamiami Formation      | Late Pliocene                   |       |
| Scolymia      | tamiamiensis | SUI  | 146178     | 53293 | 53293 | paratype | CF001    | Florida            | Tamiami Formation      | Late Pliocene                   | 15J-L |
| Scolymia      | tamiamiensis | SUI  | 146179     | 53517 | none  | paratype | CF001    | Florida            | Tamiami Formation      | Late Pliocene                   | 15I   |
| Scolymia      | tamiamiensis | SUI  | 146180     | 53521 | none  | paratype | CF001    | Florida            | Tamiami Formation      | Late Pliocene                   |       |
| Scolymia      | tamiamiensis | SUI  | 146181     | 53544 | none  | holotype | CF001    | Florida            | Tamiami Formation      | Late Pliocene                   | 15G,H |
| Scolymia      | tamiamiensis | SUI  | 146182     | 54008 | none  | paratype | CF003    | Florida            | Tamiami Formation      | Late Pliocene                   |       |
| Syzygophyllia | brevis       | NHFW | 1872-13-37 | none  | none  | syntype  | Ruditz   | Czech Republic     | none                   | Neogene                         | 7B,F  |
| Trachyphyllia | bilobata     | NMB  | D5905      | 12242 | none  | figured  | NMB15899 | Dominican Republic | Cercado Formation      | Late Miocene                    | 4G    |
| Trachyphyllia | bilobata     | USNM | 1480863    | 42229 | none  | nontype  | KB05-01  | Dominican Republic | Cercado Formation      | Late Miocene                    |       |
| Trachyphyllia | bilobata     | USNM | 1480864    | 42230 | none  | nontype  | KB05-01  | Dominican Republic | Cercado Formation      | Late Miocene                    |       |
| Trachyphyllia | bilobata     | USNM | 1480865    | 42545 | none  | nontype  | KB05-05  | Dominican Republic | Cercado Formation      | Late Miocene                    |       |
| Trachyphyllia | bilobata     | USNM | 1480866    | 42622 | none  | nontype  | KB05-08  | Dominican Republic | Cercado Formation      | Late Miocene                    |       |
| Trachyphyllia | bilobata     | USNM | 1480867    | 42734 | none  | nontype  | KB05-08  | Dominican Republic | Cercado Formation      | Late Miocene                    |       |
| Trachyphyllia | bilobata     | USNM | 1480868    | 42775 | none  | nontype  | KB05-01  | Dominican Republic | Cercado Formation      | Late Miocene                    |       |
| Trachyphyllia | bilobata     | USNM | 1480869    | 42874 | none  | nontype  | KB05-01  | Dominican Republic | Cercado Formation      | Late Miocene                    |       |
| Trachyphyllia | bilobata     | USNM | 1480870    | 42953 | none  | nontype  | NMB15899 | Dominican Republic | Cercado Formation      | Late Miocene                    |       |
| Trachyphyllia | bilobata     | USNM | 1480871    | 42959 | none  | nontype  | NMB15899 | Dominican Republic | Cercado Formation      | Late Miocene                    |       |
| Trachyphyllia | bilobata     | USNM | 1480872    | 42983 | none  | nontype  | NMB15899 | Dominican Republic | Cercado Formation      | Late Miocene                    |       |
| Trachyphyllia | bilobata     | USNM | 1480873    | 42988 | none  | nontype  | NMB15899 | Dominican Republic | Cercado Formation      | Late Miocene                    |       |

**Supplemental Appendix A.** List of all specimens studied.

|               |          |      |         |       |       |         |          |                    |                   |                                |      |
|---------------|----------|------|---------|-------|-------|---------|----------|--------------------|-------------------|--------------------------------|------|
| Trachyphyllia | bilobata | USNM | 1480874 | 42991 | none  | nontype | NMB15899 | Dominican Republic | Cercado Formation | Late Miocene                   |      |
| Trachyphyllia | bilobata | USNM | 1480875 | 42992 | none  | nontype | NMB15899 | Dominican Republic | Cercado Formation | Late Miocene                   |      |
| Trachyphyllia | bilobata | SUI  | 106583  | 42994 | 42994 | nontype | NMB15899 | Dominican Republic | Cercado Formation | Late Miocene                   |      |
| Trachyphyllia | bilobata | USNM | 1480876 | 43000 | none  | nontype | NMB15899 | Dominican Republic | Cercado Formation | Late Miocene                   |      |
| Trachyphyllia | bilobata | USNM | 1480877 | 43018 | none  | nontype | NMB15899 | Dominican Republic | Cercado Formation | Late Miocene                   |      |
| Trachyphyllia | bilobata | SUI  | 146183  | 47736 | none  | nontype | NMB15899 | Dominican Republic | Cercado Formation | Late Miocene                   |      |
| Trachyphyllia | bilobata | SUI  | 146184  | 47737 | none  | nontype | NMB15899 | Dominican Republic | Cercado Formation | Late Miocene                   |      |
| Trachyphyllia | bilobata | SUI  | 146185  | 47738 | none  | nontype | NMB15899 | Dominican Republic | Cercado Formation | Late Miocene                   |      |
| Trachyphyllia | bilobata | SUI  | 146186  | 47739 | none  | nontype | NMB15899 | Dominican Republic | Cercado Formation | Late Miocene                   |      |
| Trachyphyllia | bilobata | SUI  | 129450  | 47740 | 47740 | nontype | NMB15899 | Dominican Republic | Cercado Formation | Late Miocene                   |      |
| Trachyphyllia | bilobata | SUI  | 146187  | 47741 | none  | nontype | NMB15899 | Dominican Republic | Cercado Formation | Late Miocene                   |      |
| Trachyphyllia | bilobata | SUI  | 140406  | 47742 | none  | nontype | NMB15899 | Dominican Republic | Cercado Formation | Late Miocene                   |      |
| Trachyphyllia | bilobata | SUI  | 146188  | 47743 | none  | nontype | NMB15899 | Dominican Republic | Cercado Formation | Late Miocene                   |      |
| Trachyphyllia | bilobata | SUI  | 146189  | 47744 | none  | nontype | NMB15899 | Dominican Republic | Cercado Formation | Late Miocene                   |      |
| Trachyphyllia | bilobata | SUI  | 137109  | 47745 | none  | nontype | NMB15899 | Dominican Republic | Cercado Formation | Late Miocene                   |      |
| Trachyphyllia | bilobata | SUI  | 137107  | 47747 | none  | nontype | NMB15899 | Dominican Republic | Cercado Formation | Late Miocene                   |      |
| Trachyphyllia | bilobata | SUI  | 146190  | 47748 | none  | nontype | NMB15899 | Dominican Republic | Cercado Formation | Late Miocene                   |      |
| Trachyphyllia | bilobata | SUI  | 146191  | 47749 | none  | nontype | NMB15899 | Dominican Republic | Cercado Formation | Late Miocene                   |      |
| Trachyphyllia | bilobata | SUI  | 146192  | 47751 | none  | nontype | NMB15899 | Dominican Republic | Cercado Formation | Late Miocene                   |      |
| Trachyphyllia | bilobata | SUI  | 146193  | 47752 | none  | nontype | NMB15899 | Dominican Republic | Cercado Formation | Late Miocene                   |      |
| Trachyphyllia | bilobata | SUI  | 146194  | 47754 | none  | nontype | NMB15899 | Dominican Republic | Cercado Formation | Late Miocene                   |      |
| Trachyphyllia | bilobata | SUI  | 146195  | 47755 | none  | nontype | NMB15899 | Dominican Republic | Cercado Formation | Late Miocene                   |      |
| Trachyphyllia | bilobata | SUI  | 146196  | 47756 | none  | nontype | NMB15899 | Dominican Republic | Cercado Formation | Late Miocene                   |      |
| Trachyphyllia | bilobata | SUI  | 146197  | 47757 | none  | nontype | NMB15899 | Dominican Republic | Cercado Formation | Late Miocene                   |      |
| Trachyphyllia | bilobata | SUI  | 146198  | 47758 | none  | nontype | NMB15899 | Dominican Republic | Cercado Formation | Late Miocene                   |      |
| Trachyphyllia | bilobata | SUI  | 140407  | 47759 | none  | nontype | NMB15899 | Dominican Republic | Cercado Formation | Late Miocene                   |      |
| Trachyphyllia | bilobata | SUI  | 146199  | 47760 | none  | nontype | NMB15899 | Dominican Republic | Cercado Formation | Late Miocene                   |      |
| Trachyphyllia | bilobata | SUI  | 146200  | 47761 | none  | nontype | NMB15899 | Dominican Republic | Cercado Formation | Late Miocene                   |      |
| Trachyphyllia | bilobata | SUI  | 146201  | 47762 | none  | nontype | NMB15899 | Dominican Republic | Cercado Formation | Late Miocene                   |      |
| Trachyphyllia | bilobata | SUI  | 146202  | 47763 | none  | nontype | NMB15899 | Dominican Republic | Cercado Formation | Late Miocene                   |      |
| Trachyphyllia | bilobata | SUI  | 137108  | 47764 | 47764 | nontype | NMB15899 | Dominican Republic | Cercado Formation | Late Miocene                   |      |
| Trachyphyllia | bilobata | SUI  | 146203  | 47765 | none  | nontype | NMB15899 | Dominican Republic | Cercado Formation | Late Miocene                   |      |
| Trachyphyllia | bilobata | SUI  | 146204  | 47766 | none  | nontype | NMB15899 | Dominican Republic | Cercado Formation | Late Miocene                   |      |
| Trachyphyllia | bilobata | SUI  | 129437  | 47767 | 47767 | figured | NMB15899 | Dominican Republic | Cercado Formation | Late Miocene                   | 4H.I |
| Trachyphyllia | bilobata | SUI  | 146205  | 47768 | none  | nontype | NMB15899 | Dominican Republic | Cercado Formation | Late Miocene                   |      |
| Trachyphyllia | bilobata | SUI  | 146206  | 47769 | none  | nontype | NMB15899 | Dominican Republic | Cercado Formation | Late Miocene                   |      |
| Trachyphyllia | bilobata | SUI  | 146207  | 47770 | none  | nontype | NMB15899 | Dominican Republic | Cercado Formation | Late Miocene                   |      |
| Trachyphyllia | bilobata | USNM | 1456625 | 43107 | none  | nontype | NMB16828 | Dominican Republic | Gurabo Formation  | Late Miocene to Early Pliocene |      |
| Trachyphyllia | bilobata | NMB  | D5922   | 12288 | none  | nontype | NMB16818 | Dominican Republic | Gurabo Formation  | Late Miocene to Early Pliocene |      |
| Trachyphyllia | bilobata | USNM | 1480878 | 42150 | none  | nontype | NMB16859 | Dominican Republic | Gurabo Formation  | Late Miocene to Early Pliocene |      |





**Supplemental Appendix A.** List of all specimens studied.

[illegible]

**Supplemental Appendix A.** List of all specimens studied.

|               |           |       |           |       |      |                                       |          |                    |                      |                                |      |
|---------------|-----------|-------|-----------|-------|------|---------------------------------------|----------|--------------------|----------------------|--------------------------------|------|
| Trachyphyllia | bilobata  | SUI   | 146312    | 55138 | none | nontype                               | JK16-08  | Dominican Republic | Gurabo/Mao Formation | Early Pliocene                 |      |
| Trachyphyllia | bilobata  | SUI   | 146313    | 55143 | none | nontype                               | JK16-08  | Dominican Republic | Gurabo/Mao Formation | Early Pliocene                 |      |
| Trachyphyllia | bilobata  | SUI   | 146314    | 55144 | none | nontype                               | JK16-08  | Dominican Republic | Gurabo/Mao Formation | Early Pliocene                 |      |
| Trachyphyllia | bilobata  | SUI   | 146315    | 55148 | none | nontype                               | JK16-08  | Dominican Republic | Gurabo/Mao Formation | Early Pliocene                 |      |
| Trachyphyllia | bilobata  | SUI   | 146316    | 55149 | none | nontype                               | JK16-08  | Dominican Republic | Gurabo/Mao Formation | Early Pliocene                 |      |
| Trachyphyllia | bilobata  | SUI   | 146317    | 55153 | none | nontype                               | JK16-08  | Dominican Republic | Gurabo/Mao Formation | Early Pliocene                 |      |
| Trachyphyllia | bilobata  | USNM  | 1480893   | 42942 | none | nontype                               | NMB15822 | Dominican Republic | Mao Formation        | Early Pliocene                 |      |
| Trachyphyllia | bilobata  | SUI   | 146318    | 47006 | none | nontype                               | NMB17023 | Dominican Republic | Mao Formation        | Early Pliocene                 |      |
| Trachyphyllia | bilobata  | SUI   | 146319    | 47473 | none | nontype                               | NMB17023 | Dominican Republic | Mao Formation        | Early Pliocene                 |      |
| Trachyphyllia | bilobata  | USNM  | 1480894   | 42184 | none | nontype                               | NMB16884 | Dominican Republic | Mao Formation        | Early Pliocene                 |      |
| Trachyphyllia | bilobata  | NHMUK | PI R28753 | none  | none | holotype                              | none     | Dominican Republic | Nivaje Shale         | Neogene                        | 4A,B |
| Trachyphyllia | bilobata  | SUI   | 146320    | 53036 | none | nontype                               | CF003    | Florida            | Tamiami Formation    | Late Pliocene                  |      |
| Trachyphyllia | bilobata  | SUI   | 146321    | 53041 | none | nontype                               | CF003    | Florida            | Tamiami Formation    | Late Pliocene                  |      |
| Trachyphyllia | bilobata  | SUI   | 146322    | 53291 | none | nontype                               | CF001    | Florida            | Tamiami Formation    | Late Pliocene                  |      |
| Trachyphyllia | bilobata  | SUI   | 146323    | 53359 | none | nontype                               | LF001    | Florida            | Tamiami Formation    | Late Pliocene                  |      |
| Trachyphyllia | bilobata  | SUI   | 146324    | 53720 | none | nontype                               | CF038    | Florida            | Tamiami Formation    | Late Pliocene                  |      |
| Trachyphyllia | bilobata  | SUI   | 146325    | 53722 | none | nontype                               | CF002    | Florida            | Tamiami Formation    | Late Pliocene                  |      |
| Trachyphyllia | bilobata  | SUI   | 146326    | 53727 | none | nontype                               | CF001    | Florida            | Tamiami Formation    | Late Pliocene                  |      |
| Trachyphyllia | bilobata  | SUI   | 146327    | 54038 | none | nontype                               | CF003    | Florida            | Tamiami Formation    | Late Pliocene                  |      |
| Trachyphyllia | bilobata  | SUI   | 146328    | 54080 | none | nontype                               | CF002    | Florida            | Tamiami Formation    | Late Pliocene                  |      |
| Trachyphyllia | bilobata  | NHMUK | PI R40412 | none  | none | holotype of <i>Antillia ponderosa</i> | none     | Jamaica            | ?Bowden Formation    | Neogene                        | 4D,E |
| Trachyphyllia | bilobata  | USNM  | 1480895   | 5103  | none | nontype                               | AB94-12  | Jamaica            | Bowden Formation     | Late Pliocene                  |      |
| Trachyphyllia | bilobata  | USNM  | 1480896   | 5104  | none | nontype                               | AB94-13  | Jamaica            | Bowden Formation     | Late Pliocene                  |      |
| Trachyphyllia | bilobata  | USNM  | 1480898   | 5096  | none | nontype                               | AB94-02  | Jamaica            | Bowden Formation     | Late Pliocene                  |      |
| Trachyphyllia | bilobata  | USNM  | 1480899   | 5097  | none | nontype                               | AB94-01  | Jamaica            | Bowden Formation     | Late Pliocene                  |      |
| Trachyphyllia | bilobata  | USNM  | 1480900   | 5098  | none | nontype                               | AB94-01  | Jamaica            | Bowden Formation     | Late Pliocene                  |      |
| Trachyphyllia | bilobata  | USNM  | 1480901   | 5099  | none | nontype                               | AB94-01  | Jamaica            | Bowden Formation     | Late Pliocene                  |      |
| Trachyphyllia | bilobata  | USNM  | 1480902   | 5100  | none | nontype                               | AB94-01  | Jamaica            | Bowden Formation     | Late Pliocene                  |      |
| Trachyphyllia | bilobata  | USNM  | 1480903   | 5102  | none | nontype                               | AB94-01  | Jamaica            | Bowden Formation     | Late Pliocene                  |      |
| Trachyphyllia | bilobata  | USNM  | 1480904   | 4760a | none | nontype                               | AB94-01  | Jamaica            | Bowden Formation     | Late Pliocene                  |      |
| Trachyphyllia | bilobata  | NHMUK | PI R28942 | none  | none | holotype of <i>Antillia walli</i>     | none     | Jamaica            | Bowden Formation     | Neogene                        | 4C,F |
| Trachyphyllia | bilobata  | USNM  | 1480905   | 4558  | none | nontype                               | AB94-33  | Jamaica            | Hope Gate Formation  | Early Pleistocene              |      |
| Trachyphyllia | bilobata  | USNM  | 1480906   | 4573  | none | nontype                               | AB94-74  | Jamaica            | Hope Gate Formation  | Early Pleistocene              |      |
| Trachyphyllia | bilobata  | USNM  | 1480907   | 50073 | none | nontype                               | AB99-09  | Panama             | Old Bank Formation   | Late Miocene                   |      |
| Trachyphyllia | bilobata  | USNM  | 1480908   | 50080 | none | nontype                               | AB99-09  | Panama             | Old Bank Formation   | Late Miocene                   |      |
| Trachyphyllia | bilobata  | USNM  | 1480909   | 50082 | none | nontype                               | AB99-09  | Panama             | Old Bank Formation   | Late Miocene                   |      |
| Trachyphyllia | chipolana | NMB   | D6613     | 12201 | none | figured                               | NMB15838 | Dominican Republic | Gurabo Formation     | Late Miocene to Early Pliocene | 5B,E |
| Trachyphyllia | chipolana | USNM  | 66232     | none  | none | holotype                              | USGS2564 | Florida            | Chipola Formation    | Early Miocene                  | 5A,D |
| Trachyphyllia | chipolana | SUI   | 146329    | 53034 | none | nontype                               | CF003    | Florida            | Tamiami Formation    | Late Pliocene                  |      |
| Trachyphyllia | chipolana | SUI   | 146330    | 53037 | none | nontype                               | CF003    | Florida            | Tamiami Formation    | Late Pliocene                  |      |
| Trachyphyllia | chipolana | SUI   | 146331    | 53038 | none | nontype                               | CF003    | Florida            | Tamiami Formation    | Late Pliocene                  |      |
| Trachyphyllia | chipolana | SUI   | 146332    | 53039 | none | nontype                               | CF003    | Florida            | Tamiami Formation    | Late Pliocene                  |      |
| Trachyphyllia | chipolana | SUI   | 146333    | 53040 | none | nontype                               | CF003    | Florida            | Tamiami Formation    | Late Pliocene                  |      |
| Trachyphyllia | chipolana | SUI   | 146334    | 53042 | none | nontype                               | CF003    | Florida            | Tamiami Formation    | Late Pliocene                  |      |
| Trachyphyllia | chipolana | SUI   | 146335    | 53061 | none | nontype                               | CF003    | Florida            | Tamiami Formation    | Late Pliocene                  |      |
| Trachyphyllia | chipolana | SUI   | 146336    | 53062 | none | nontype                               | CF003    | Florida            | Tamiami Formation    | Late Pliocene                  |      |
| Trachyphyllia | chipolana | SUI   | 146337    | 53110 | none | nontype                               | LF001    | Florida            | Tamiami Formation    | Late Pliocene                  |      |
| Trachyphyllia | chipolana | SUI   | 146338    | 53111 | none | nontype                               | LF001    | Florida            | Tamiami Formation    | Late Pliocene                  |      |
| Trachyphyllia | chipolana | SUI   | 146339    | 53112 | none | nontype                               | LF001    | Florida            | Tamiami Formation    | Late Pliocene                  |      |
| Trachyphyllia | chipolana | SUI   | 146340    | 53113 | none | nontype                               | LF001    | Florida            | Tamiami Formation    | Late Pliocene                  |      |
| Trachyphyllia | chipolana | SUI   | 146341    | 53114 | none | nontype                               | LF001    | Florida            | Tamiami Formation    | Late Pliocene                  |      |
| Trachyphyllia | chipolana | SUI   | 146342    | 53115 | none | nontype                               | LF001    | Florida            | Tamiami Formation    | Late Pliocene                  |      |
| Trachyphyllia | chipolana | SUI   | 146343    | 53116 | none | nontype                               | LF001    | Florida            | Tamiami Formation    | Late Pliocene                  |      |
| Trachyphyllia | chipolana | SUI   | 146344    | 53117 | none | nontype                               | LF001    | Florida            | Tamiami Formation    | Late Pliocene                  |      |
| Trachyphyllia | chipolana | SUI   | 146345    | 53119 | none | nontype                               | LF001    | Florida            | Tamiami Formation    | Late Pliocene                  |      |
| Trachyphyllia | chipolana | SUI   | 146346    | 53134 | none | nontype                               | LF001    | Florida            | Tamiami Formation    | Late Pliocene                  |      |
| Trachyphyllia | chipolana | SUI   | 146347    | 53146 | none | nontype                               | CF003    | Florida            | Tamiami Formation    | Late Pliocene                  |      |
| Trachyphyllia | chipolana | SUI   | 146348    | 53147 | none | nontype                               | CF003    | Florida            | Tamiami Formation    | Late Pliocene                  |      |
| Trachyphyllia | chipolana | SUI   | 146349    | 53148 | none | nontype                               | CF003    | Florida            | Tamiami Formation    | Late Pliocene                  |      |
| Trachyphyllia | chipolana | SUI   | 146350    | 53149 | none | nontype                               | CF003    | Florida            | Tamiami Formation    | Late Pliocene                  |      |
| Trachyphyllia | chipolana | SUI   | 146351    | 53150 | none | nontype                               | CF003    | Florida            | Tamiami Formation    | Late Pliocene                  |      |
| Trachyphyllia | chipolana | SUI   | 146352    | 53151 | none | nontype                               | CF003    | Florida            | Tamiami Formation    | Late Pliocene                  |      |
| Trachyphyllia | chipolana | SUI   | 146353    | 53152 | none | nontype                               | CF003    | Florida            | Tamiami Formation    | Late Pliocene                  |      |
| Trachyphyllia | chipolana | SUI   | 146354    | 53153 | none | nontype                               | CF003    | Florida            | Tamiami Formation    | Late Pliocene                  |      |
| Trachyphyllia | chipolana | SUI   | 146355    | 53154 | none | nontype                               | CF003    | Florida            | Tamiami Formation    | Late Pliocene                  |      |

**Supplemental Appendix A.** List of all specimens studied.

[illegible]



**Supplemental Appendix A.** List of all specimens studied.

|               |           |      |         |       |             |          |          |                    |                                  |                                |      |
|---------------|-----------|------|---------|-------|-------------|----------|----------|--------------------|----------------------------------|--------------------------------|------|
| Trachyphyllia | chipolana | SUI  | 146437  | 53878 | none        | nontype  | CF002    | Florida            | Tamiami Formation                | Late Pliocene                  |      |
| Trachyphyllia | chipolana | SUI  | 146438  | 53879 | none        | nontype  | CF002    | Florida            | Tamiami Formation                | Late Pliocene                  |      |
| Trachyphyllia | chipolana | SUI  | 146439  | 53880 | none        | nontype  | CF002    | Florida            | Tamiami Formation                | Late Pliocene                  |      |
| Trachyphyllia | chipolana | SUI  | 146440  | 53881 | none        | nontype  | CF003    | Florida            | Tamiami Formation                | Late Pliocene                  |      |
| Trachyphyllia | chipolana | SUI  | 146441  | 54011 | none        | nontype  | CF003    | Florida            | Tamiami Formation                | Late Pliocene                  |      |
| Trachyphyllia | chipolana | SUI  | 146442  | 54035 | none        | nontype  | CF001    | Florida            | Tamiami Formation                | Late Pliocene                  |      |
| Trachyphyllia | chipolana | SUI  | 146443  | 54036 | none        | nontype  | CF003    | Florida            | Tamiami Formation                | Late Pliocene                  |      |
| Trachyphyllia | chipolana | SUI  | 146444  | 54037 | none        | nontype  | CF003    | Florida            | Tamiami Formation                | Late Pliocene                  |      |
| Trachyphyllia | chipolana | SUI  | 146445  | 54039 | none        | nontype  | CF003    | Florida            | Tamiami Formation                | Late Pliocene                  |      |
| Trachyphyllia | chipolana | SUI  | 146446  | 54040 | none        | nontype  | CF003    | Florida            | Tamiami Formation                | Late Pliocene                  |      |
| Trachyphyllia | chipolana | SUI  | 146447  | 54075 | none        | nontype  | CF038    | Florida            | Tamiami Formation                | Late Pliocene                  |      |
| Trachyphyllia | chipolana | SUI  | 146448  | 54076 | none        | nontype  | CF038    | Florida            | Tamiami Formation                | Late Pliocene                  |      |
| Trachyphyllia | chipolana | SUI  | 146449  | 54077 | none        | nontype  | CF003    | Florida            | Tamiami Formation                | Late Pliocene                  |      |
| Trachyphyllia | chipolana | SUI  | 146450  | 54078 | none        | nontype  | CF003    | Florida            | Tamiami Formation                | Late Pliocene                  |      |
| Trachyphyllia | chipolana | SUI  | 146451  | 54079 | none        | nontype  | CF003    | Florida            | Tamiami Formation                | Late Pliocene                  |      |
| Trachyphyllia | chipolana | SUI  | 146452  | 54081 | none        | nontype  | CF002    | Florida            | Tamiami Formation                | Late Pliocene                  |      |
| Trachyphyllia | chipolana | SUI  | 146453  | 54082 | none        | nontype  | CF002    | Florida            | Tamiami Formation                | Late Pliocene                  |      |
| Trachyphyllia | chipolana | SUI  | 146454  | 54083 | none        | nontype  | CF002    | Florida            | Tamiami Formation                | Late Pliocene                  |      |
| Trachyphyllia | chipolana | SUI  | 146455  | 54240 | none        | nontype  | CF003    | Florida            | Tamiami Formation                | Late Pliocene                  |      |
| Trachyphyllia | chipolana | SUI  | 146456  | 54241 | none        | nontype  | CF003    | Florida            | Tamiami Formation                | Late Pliocene                  |      |
| Trachyphyllia | chipolana | SUI  | 146457  | 54250 | none        | nontype  | CF003    | Florida            | Tamiami Formation                | Late Pliocene                  |      |
| Trachyphyllia | chipolana | SUI  | 146458  | 54438 | none        | nontype  | LF001    | Florida            | Tamiami Formation                | Late Pliocene                  |      |
| Trachyphyllia | chipolana | SUI  | 146459  | 54447 | none        | nontype  | LF001    | Florida            | Tamiami Formation                | Late Pliocene                  |      |
| Trachyphyllia | chipolana | SUI  | 146460  | 54481 | none        | nontype  | CF001    | Florida            | Tamiami Formation                | Late Pliocene                  |      |
| Trachyphyllia | chipolana | SUI  | 137213  | none  | casebolt038 | figured  | CF002    | Florida            | Tamiami Formation                | Late Pliocene                  | 5C,F |
| Trachyphyllia | chipolana | SUI  | 137105  | none  | MP17        | nontype  | CF002    | Florida            | Tamiami Formation                | Late Pliocene                  |      |
| Trachyphyllia | chipolana | SUI  | 140405  | none  | cts037      | nontype  | CF002    | Florida            | Tamiami Formation                | Late Pliocene                  |      |
| Trachyphyllia | chipolana | SUI  | 129405  | none  | none        | nontype  | CF002    | Florida            | Tamiami Formation                | Late Pliocene                  |      |
| Trachyphyllia | mcneilli  | SUI  | 102824  | 9584  | none        | holotype | AB95-35  | Curacao            | Seroe Domi Formation (ridges)    | Early Pliocene                 | 5G,J |
| Trachyphyllia | mcneilli  | SUI  | 102825  | 9585  | none        | paratype | AB95-35  | Curacao            | Seroe Domi Formation (ridges)    | Early Pliocene                 |      |
| Trachyphyllia | mcneilli  | SUI  | 140394  | 9592  | none        | paratype | AB95-35  | Curacao            | Seroe Domi Formation (ridges)    | Early Pliocene                 |      |
| Trachyphyllia | mcneilli  | SUI  | 140400  | 9617  | 9617        | paratype | AB95-35  | Curacao            | Seroe Domi Formation (ridges)    | Early Pliocene                 | 5I,L |
| Trachyphyllia | mcneilli  | USNM | 1480910 | 9582  | none        | nontype  | AB95-36  | Curacao            | Seroe Domi Formation (ridges)    | Early Pliocene                 |      |
| Trachyphyllia | mcneilli  | USNM | 1480911 | 9583  | none        | nontype  | AB95-36  | Curacao            | Seroe Domi Formation (ridges)    | Early Pliocene                 |      |
| Trachyphyllia | mcneilli  | USNM | 1480912 | 9588  | none        | nontype  | AB95-36  | Curacao            | Seroe Domi Formation (ridges)    | Early Pliocene                 |      |
| Trachyphyllia | mcneilli  | USNM | 1480913 | 9602  | none        | nontype  | AB95-50  | Curacao            | Seroe Domi Formation (ridges)    | Early Pliocene                 |      |
| Trachyphyllia | mcneilli  | USNM | 1480914 | 9759  | none        | nontype  | AB95-35  | Curacao            | Seroe Domi Formation (ridges)    | Early Pliocene                 |      |
| Trachyphyllia | mcneilli  | USNM | 1480915 | 9587  | none        | nontype  | AB95-59  | Curacao            | Seroe Domi Formation (ridges)    | Early Pliocene                 |      |
| Trachyphyllia | mcneilli  | USNM | 1480916 | 9595  | none        | nontype  | AB95-82  | Curacao            | Seroe Domi Formation (ridges)    | Early Pliocene                 |      |
| Trachyphyllia | mcneilli  | USNM | 1480917 | 9597  | none        | nontype  | AB95-61  | Curacao            | Seroe Domi Formation (ridges)    | Early Pliocene                 |      |
| Trachyphyllia | mcneilli  | USNM | 1480918 | 9757  | none        | nontype  | AB95-60  | Curacao            | Seroe Domi Formation (ridges)    | Early Pliocene                 |      |
| Trachyphyllia | mcneilli  | USNM | 1480919 | 9758  | none        | nontype  | AB95-32  | Curacao            | Seroe Domi Formation (sea cliff) | Early Pleistocene              |      |
| Trachyphyllia | mcneilli  | USNM | 1480920 | 44815 | none        | nontype  | JK06-19  | Dominican Republic | Cercado Formation                | Late Miocene                   |      |
| Trachyphyllia | mcneilli  | USNM | 1480921 | 44817 | none        | nontype  | JK06-19  | Dominican Republic | Cercado Formation                | Late Miocene                   |      |
| Trachyphyllia | mcneilli  | USNM | 1480922 | 44819 | none        | nontype  | JK06-19  | Dominican Republic | Cercado Formation                | Late Miocene                   |      |
| Trachyphyllia | mcneilli  | USNM | 1480923 | 44820 | none        | nontype  | JK06-19  | Dominican Republic | Cercado Formation                | Late Miocene                   |      |
| Trachyphyllia | mcneilli  | USNM | 1480924 | 44823 | none        | nontype  | JK06-19  | Dominican Republic | Cercado Formation                | Late Miocene                   |      |
| Trachyphyllia | mcneilli  | SUI  | 146461  | 54745 | none        | nontype  | BB-15-84 | Dominican Republic | Gurabo Formation                 | Late Miocene to Early Pliocene |      |
| Trachyphyllia | mcneilli  | SUI  | 146462  | 54746 | none        | nontype  | BB-15-84 | Dominican Republic | Gurabo Formation                 | Late Miocene to Early Pliocene |      |
| Trachyphyllia | mcneilli  | SUI  | 146463  | 54749 | none        | nontype  | BB-15-83 | Dominican Republic | Gurabo Formation                 | Late Miocene to Early Pliocene |      |
| Trachyphyllia | mcneilli  | SUI  | 146464  | 54750 | none        | nontype  | BB-15-83 | Dominican Republic | Gurabo Formation                 | Late Miocene to Early Pliocene |      |
| Trachyphyllia | mcneilli  | SUI  | 146465  | 54751 | none        | nontype  | BB-15-83 | Dominican Republic | Gurabo Formation                 | Late Miocene to Early Pliocene |      |
| Trachyphyllia | mcneilli  | SUI  | 146466  | 54756 | none        | nontype  | BB-15-83 | Dominican Republic | Gurabo Formation                 | Late Miocene to Early Pliocene |      |
| Trachyphyllia | mcneilli  | SUI  | 146467  | 54758 | none        | paratype | BB-15-84 | Dominican Republic | Gurabo Formation                 | Late Miocene to Early Pliocene | 5H,K |

**Supplemental Appendix A.** List of all specimens studied.

|               |          |      |         |       |      |          |          |                    |                    |                                |  |
|---------------|----------|------|---------|-------|------|----------|----------|--------------------|--------------------|--------------------------------|--|
| Trachyphyllia | mcneilli | USNM | 1480925 | 42131 | none | nontype  | NMB15837 | Dominican Republic | Gurabo Formation   | Late Miocene to Early Pliocene |  |
| Trachyphyllia | mcneilli | USNM | 1480926 | 44813 | none | nontype  | NMB15837 | Dominican Republic | Gurabo Formation   | Late Miocene to Early Pliocene |  |
| Trachyphyllia | mcneilli | USNM | 1480927 | 44814 | none | nontype  | NMB16817 | Dominican Republic | Gurabo Formation   | Late Miocene to Early Pliocene |  |
| Trachyphyllia | mcneilli | SUI  | 146468  | 47009 | none | nontype  | NMB17023 | Dominican Republic | Mao Formation      | Early Pliocene                 |  |
| Trachyphyllia | mcneilli | SUI  | 146469  | 47133 | none | nontype  | JK08-21  | Dominican Republic | Mao Formation      | Early Pliocene                 |  |
| Trachyphyllia | mcneilli | SUI  | 146470  | 47564 | none | nontype  | JK08-18  | Dominican Republic | Mao Formation      | Early Pliocene                 |  |
| Trachyphyllia | mcneilli | SUI  | 146471  | 55199 | none | nontype  | JK16-14  | Dominican Republic | Mao Formation      | Early Pliocene                 |  |
| Trachyphyllia | mcneilli | SUI  | 140402  | none  | none | paratype | NMB16884 | Republic           | Mao Formation      | Early Pliocene                 |  |
| Trachyphyllia | mcneilli | USNM | 1480928 | 42175 | none | nontype  | NMB16884 | Dominican Republic | Mao Formation      | Early Pliocene                 |  |
| Trachyphyllia | mcneilli | USNM | 1480929 | 42182 | none | nontype  | NMB16884 | Dominican Republic | Mao Formation      | Early Pliocene                 |  |
| Trachyphyllia | mcneilli | SUI  | 128628  | 50156 | none | nontype  | CM-08-9  | Panama             | Old Bank Formation | Late Miocene                   |  |
