# Supplementary material
Source: publisher figshare collection journal article supplement (https://tandf.figshare.com/articles/dataset/_/7624892)
Supplement: Supplementary file 6 [file 2]

**Supplemental Appendix E.** List of localities and their geologic ages.

| <b>Island</b>      | <b>Formation</b>                       | <b>Geologic Age</b>            | <b>Absolute Age Range (Ma)</b> | <b>Source</b>                       |
|--------------------|----------------------------------------|--------------------------------|--------------------------------|-------------------------------------|
| Costa Rica         | Moin Formation                         | Early Pleistocene              | 0.8-2.4                        | McNeill <i>et al.</i> 2000          |
| Costa Rica         | Q.Chocolate Formation                  | Late Pliocene                  | 3-3.7                          | McNeill <i>et al.</i> 2000          |
| Curacao            | Lower Terrace                          | Late Pleistocene               | 0.10-0.15                      | Budd <i>et al.</i> 1998             |
| Curacao            | Middle Terrace                         | Middle Pleistocene             | 0.5-0.6                        | Budd <i>et al.</i> 1998             |
| Curacao            | Seroe Domi Formation (sea-cliff)       | Early Pleistocene              | 2.6-2                          | Budd <i>et al.</i> 1998             |
| Curacao            | Seroe Domi Formation (ridges)          | Early Pliocene                 | 5.6-3                          | Budd <i>et al.</i> 1998             |
| Curacao            | Seroe Domi Formation (flatiron)        | Middle Miocene                 | 14.9-16.2                      | Budd <i>et al.</i> 1998             |
| Dominican Republic | Cercado Formation                      | Late Miocene                   | 5.9-6.45                       | McNeill <i>et al.</i> 2012          |
| Dominican Republic | Gurabo Formation                       | Late Miocene to Early Pliocene | 3.7-6.15                       | McNeill <i>et al.</i> 2012          |
| Dominican Republic | Mao Formation                          | Early Pliocene                 | 3.4-3.7                        | McNeill <i>et al.</i> 2012          |
| Dominican Republic | Los Haitises Formation                 | Plio-Pleistocene               | 0.8-3.6                        | Braga <i>et al.</i> 2012            |
| Florida            | Chipola Formation                      | Early Miocene                  | 18-19                          | Jones <i>et al.</i> 1993            |
| Florida            | Tamiami Formation (Golden Gate Member) | Late Pliocene                  | 2.8-3.2                        | Klaus <i>et al.</i> 2017            |
| Florida            | Arcadia Formation (Tampa Member)       | Oligo- Miocene                 | 22.3-26.0                      | Brewster-Wingard <i>et al.</i> 1997 |
| Jamaica            | Bowden Formation                       | Late Pliocene                  | 2.7-3.8                        | Budd & McNeill 1998                 |
| Jamaica            | Falmouth Formation                     | Late Pleistocene               | 0.10-0.15                      | Budd & McNeill 1998                 |
| Jamaica            | Hope Gate Formation                    | Early Pleistocene              | 1-1.8                          | Budd & McNeill 1998                 |
| Jamaica            | Manchioneal Formation                  | Early Pleistocene              | 1.4-1.9                        | Budd & McNeill 1998                 |
| Jamaica            | Old Pera Beds                          | Plio-Pleistocene               | 1.8-3                          | Budd & McNeill 1998                 |
| Panama             | Culebra Formation (Emperador)          | Early Miocene                  | 17.8-2.5                       | Johnson & Kirby 2006                |
| Panama             | Isla Colon Formation                   | Early Pleistocene              | 1.4-2.2                        | McNeill <i>et al.</i> 2013          |
| Panama             | Old Bank Formation (Fish Hole)         | Late Miocene                   | 5.6-5.8                        | McNeill <i>et al.</i> 2013          |
| Panama             | Uraccá Formation                       | Early Pleistocene              | 0.8-1.2                        | McNeill <i>et al.</i> 2013          |
| Trinidad           | Manzanilla Formation                   | Late Miocene                   | 8.6-9.2                        | Huggins 2007                        |

Additional references for Supplemental Appendix E not included in the text:

- Braga, J. C., Díaz de Neira, A., Lasseur, E., Mediato, J., Aguirre, J., Abad, M., Hernaiz-Huerta, P. P., Monthel, J., Pérez-Valera, F. & Lopera, E. 2012. Pliocene–Lower Pleistocene shallow-water mixed siliciclastics and carbonates (Yanigua and Los Haitises formations) in eastern Hispaniola (Dominican Republic). *Sedimentary Geology*, v. 265-266, p. 182-194.
- Brewster-Wingard, G. L., Scott, T. M., Edwards, L. E., Weedman, S. D. & Simmons, K. R., 1997. Reinterpretation of the peninsular Florida Oligocene: an integrated stratigraphic approach. *Sedimentary Geology*, v. 108, p. 207-228.
- Huggins, G. V. 2007. *The facies architecture of the Manzanilla Formation, Trinidad and Tobago*, W.I. Master's thesis of the University of Texas at Austin, 81 pp.
- Johnson, K. G., & M. X. Kirby. 2006. The Emperador Limestone rediscovered: Early Miocene corals from the Culebra Formation, Panama. *Journal of Paleontology*, v. 80, p.283-293.
- Jones, D. S., Mueller, P. A., Hodell, D. A. & Stanley, L.A., 1993,  $^{87}\text{Sr}/^{86}\text{Sr}$  geochronology of Oligocene and Miocene strata in Florida. In Zullo, V. A., Harris, B. W., Scott, T. M., & Portell, R.W. Eds., The Neogene of Florida and adjacent regions; Proceedings of the third Bald Head Island conference on coastal plains geology. *Florida Geological Survey Special Publication, Hilton Head Island, S. C., November 4-8, 1992*, no 37, p. 15-31.
- McNeill, D. F., Coates, A. G., Budd, A.F. & Borne, P. F. 2000. Integrated paleontologic and paleomagnetic stratigraphy of the upper Neogene deposits around Limon, Costa Rica: A coastal emergence record of the Central American Isthmus. *Geological Society of America Bulletin*, v. 112, p.963-981.
- McNeill, D. F., Klaus, J. S., Budd, A. F., Lutz, B. & Ishman, S. 2012. Late Neogene Chronology and Sequence Stratigraphy of Mixed Carbonate-Siliciclastic Deposits of the Cibao Basin, Dominican Republic. *Geological Society of America Bulletin*, v.124, p. 35-58, doi: 10.1130/B30391.1.
- McNeill, D. F., Klaus, J. S., O'Connell, L. A., Coates, A. G., Morgan, W.A., 2013, Depositional sequences and stratigraphy of the Colon Carbonate Platform: Bocas del Toro Archipelago, Panama. *Journal of Sedimentary Research*, v. 83, p. 183-195.
